# Supplementary material for: Mediating effects of metabolic factors on the association between fruit or vegetable intake and cardiovascular disease: the Korean National Health and Nutrition Examination Survey
Source: PubMed Central journal article supplement — BMJ Open. 2018 Feb 28;8(2):e019620. doi: 10.1136/bmjopen-2017-019620 (PMC5855238; doi:10.1136/bmjopen-2017-019620), 2018-02-28
Supplement: bmjopen-2017-019620.draft_revisions.pdf [file bmjopen-2017-019620.draft_revisions.pdf]

# BMJ Open

BMJ Open is committed to open peer review. As part of this commitment we make the peer review history of every article we publish publicly available.

When an article is published we post the peer reviewers' comments and the authors' responses online. We also post the versions of the paper that were used during peer review. These are the versions that the peer review comments apply to.

The versions of the paper that follow are the versions that were submitted during the peer review process. They are not the versions of record or the final published versions. They should not be cited or distributed as the published version of this manuscript.

BMJ Open is an open access journal and the full, final, typeset and author-corrected version of record of the manuscript is available on our site with no access controls, subscription charges or pay-per-view fees (<http://bmjopen.bmj.com>).

If you have any questions on BMJ Open's open peer review process please email [info.bmjopen@bmj.com](mailto:info.bmjopen@bmj.com)

# BMJ Open

## The mediating effects of metabolic factors on the association between fruit or vegetable intake and cardiovascular disease: the Korean National Health and Nutrition Examination Survey

|                                 |                                                                                                                                                                                                                                                                                                                                                                                                                            |
|---------------------------------|----------------------------------------------------------------------------------------------------------------------------------------------------------------------------------------------------------------------------------------------------------------------------------------------------------------------------------------------------------------------------------------------------------------------------|
| Journal:                        | <i>BMJ Open</i>                                                                                                                                                                                                                                                                                                                                                                                                            |
| Manuscript ID                   | bmjopen-2017-019620                                                                                                                                                                                                                                                                                                                                                                                                        |
| Article Type:                   | Research                                                                                                                                                                                                                                                                                                                                                                                                                   |
| Date Submitted by the Author:   | 14-Sep-2017                                                                                                                                                                                                                                                                                                                                                                                                                |
| Complete List of Authors:       | Lee, Hye Ah; Mokdong Hospital, Ewha Womans University, Clinical Trial Center<br>Lim, Dohee; Korea Centers for Disease Control and Prevention<br>Oh, Kyungwon ; Korea Centers for Disease Control and Prevention, Division of Health and Nutrition Survey<br>Kim, Eun Jung ; Pyeongtaek University, Department of Nursing<br>Park, Hyesook; College of Medicine, Ewha Womans University, Department of preventive medicine, |
| <b>Primary Subject Heading</b>: | Public health                                                                                                                                                                                                                                                                                                                                                                                                              |
| Secondary Subject Heading:      | Epidemiology                                                                                                                                                                                                                                                                                                                                                                                                               |
| Keywords:                       | Cardiovascular disease, blood pressure, NUTRITION & DIETETICS                                                                                                                                                                                                                                                                                                                                                              |
|                                 |                                                                                                                                                                                                                                                                                                                                                                                                                            |

SCHOLARONE™  
Manuscripts

1  
2  
3  
4 1 **The mediating effects of metabolic factors on the association between fruit or vegetable**  
5  
6 2 **intake and cardiovascular disease: the Korean National Health and Nutrition**  
7  
8 3 **Examination Survey**  
9  
10  
11 4

14 5 Hye Ah Lee<sup>1</sup>, Dohee Lim<sup>2</sup>, Kyungwon Oh<sup>2</sup>, Eun Jung Kim<sup>3</sup>,

16 6 Hyesook Park<sup>4</sup>

18 7 <sup>1</sup>Clinical Trial Center, Mokdong Hospital, Ewha Womans University, Seoul, <sup>2</sup>Division of  
19 8 Health and Nutrition Survey, Korea Centers for Disease Control and Prevention, Cheongwon-  
20 9 gun, <sup>3</sup>Department of Nursing, Pyeongtaek University, Pyeongtaek, <sup>4</sup>Department of preventive  
21 10 medicine, College of Medicine, Ewha Womans University, Seoul, Korea  
22  
23  
24  
25  
26  
27  
28  
29  
30  
31  
32  
33  
34

35 14 **Address for corresponding author:** Hyesook Park, MD, Ph.D.

38 15 Department of Preventive Medicine, School of Medicine, Ewha Womans University, 1071,  
39 16 Anyangcheon-ro, Yangcheon-ku, Seoul 158-710, Republic of Korea  
40  
41  
42

43 17 Tel : +82.2-2650-5756, Fax: +82.2-2652-8325  
44  
45

46 18 E-mail : [hpark@ewha.ac.kr](mailto:hpark@ewha.ac.kr)  
47  
48  
49  
50  
51

52 20 **Word count:** 2,637  
53  
54

1  
2  
3  
4 21 **Abstract**

5  
6  
7 22 **Objective:** We assessed the mediating effects of metabolic components on the relationship  
8  
9 23 between fruit or vegetable intake and cardiovascular disease (CVD).  
10

11  
12 24 **Design:** Cross-sectional study  
13

14  
15 25 **Setting:** This study was conducted using data from the 2013–2015 Korean National Health  
16  
17 26 and Nutrition Examination Survey, which is a national representative cross-sectional survey  
18  
19 27 to assess health and nutritional status in the Korean population.  
20

21  
22 28 **Method and analysis:** A total of 9,040 subjects (3,555 males and 5,485 females) aged  $\geq 25$   
23  
24 29 years were included in the study. Physician-diagnosed CVD was used as the outcome. Fruit  
25  
26 30 or vegetable intake was measured via a dish-based semi-quantitative food frequency  
27  
28 31 questionnaire and grouped into categories ( $< 1$  time/d, 1 time/d, 2 times/d, and  $\geq 3$  times/d).  
29  
30 32 Systolic blood pressure (SBP), cholesterol, and fasting glucose were considered metabolic  
31  
32 33 mediators, and the bootstrap method was used to assess mediating effect.  
33  
34

35  
36 34 **Results:** About 1.8% of adults aged 25–64years had CVD. The risk for CVD decreased by  
37  
38 35 14% as fruit, but not vegetable, intake was increased by one unit per day. After additional  
39  
40 36 adjustment for metabolic factors, the odds ratio was attenuated to 0.89 (95% confidence  
41  
42 37 interval; 0.77–1.03). This result indicates that the indirect effect of three metabolic factors  
43  
44 38 accounted for 21.4% of the relationship between fruit intake and CVD. SBP was a more  
45  
46 39 important metabolic mediator than the other factors. The indirect effect accounted for 30.0%  
47  
48 40 when body mass index was additionally controlled as a mediator, and SBP still had an  
49  
50 41 independent effect compared to the other mediators.  
51  
52

1  
2  
3  
4 42 **Conclusions:** Our results indicate that controlling SBP may lessen the CVD risk, and a diet  
5  
6 43 rich in fruits can regulate SBP, which, in turn, reduces CVD risk.  
7  
8

9 44 **Keywords:** Cardiovascular disease, blood pressure, diet  
10  
11  
12 45  
13  
14

## 15 46 **ARTICLE SUMMARY**

16  
17 47  
18

### 19 48 **Strengths and limitations of this study**

- 20  
21 49 - In this study, we assessed how fruit or vegetable intake is related to CVD by assessing  
22  
23 50 the indirect effect of systolic blood pressure (SBP), total cholesterol, and fasting  
24  
25 51 glucose. Of them, the mediating effect of SBP on the association between fruit intake  
26  
27 52 and CVD was dominant.  
28  
29  
30 53 - Our study suggests that controlling SBP might lessen CVD risk, and a diet rich in fruits  
31  
32 54 can be used to regulate SBP, which, in turn, reduces CVD risk.  
33  
34 55 - The results were derived from a cross-sectional study design, so causal relationships  
35  
36 56 could not be effectively drawn.  
37  
38  
39 57  
40  
41 58  
42  
43 59  
44  
45 60  
46  
47 61  
48  
49 62  
50  
51 63  
52  
53

## 64 INTRODUCTION

65  
66 Cardiovascular diseases (CVDs) are responsible for mortality worldwide; a report from  
67 the World Health Organization stated that CVDs accounted for 31% of all deaths worldwide  
68 in 2015 [1]. Although mortality from ischemic heart disease has shown a flat trend and that  
69 from cerebrovascular disease has shown a declining trend in the Republic of Korea since  
70 2005, these causes of death remain highly ranked [2].

71 Several risk factors for CVDs, including metabolic factors, such as high glucose, high  
72 blood pressure, and high cholesterol, have been suggested [3]. Several studies have suggested  
73 that these metabolic factors are also linked to risk factors (e.g., body mass index [BMI] and  
74 dietary factors) and CVD risk as mediators [4, 5]. The causal link between these mediators  
75 and disease risk must be identified for an effective public health intervention. However,  
76 previous studies focused on a single relationship between a risk factor and a disease rather  
77 than the mediating effects.

78 Excessive risk for CVD caused by poor diet and chronic diseases was reported from a  
79 study of global burden of disease (GBD). In addition, the GBD study established causal  
80 mediating relationships between a diet poor in fruits or vegetables, metabolic mediators  
81 (blood pressure, cholesterol, and glucose), and disease [4]. These metabolic mediators have  
82 also been linked to BMI and CVD [4]. The effect of a diet rich in fruits and vegetables on  
83 BMI has been reported through epidemiological studies [6], but few studies have assessed  
84 BMI as a mediator.

85 There is a need to study the degree to which these metabolic factors contribute to the  
86 relationship between risk factors and disease. Thus, using cross-sectional survey data from

1  
2  
3  
4  
5  
6  
7  
8  
9  
10  
11  
12  
13  
14  
15  
16  
17  
18  
19  
20  
21  
22  
23  
24  
25  
26  
27  
28  
29  
30  
31  
32  
33  
34  
35  
36  
37  
38  
39  
40  
41  
42  
43  
44  
45  
46  
47  
48  
49  
50  
51  
52  
53  
54  
55  
56  
57  
58  
59  
60

87 the 2013–2015 Korean National Health and Nutrition Examination Survey (KNHANES), we  
88 assessed the mediating effects of metabolic components applied to a confirmatory model.  
89 Furthermore, we assessed how the BMI contributes to the relationship between fruit or  
90 vegetable intake and CVD as a confounder or mediator.

91  
92  
93  
94  
95  
96  
97  
98  
99  
100  
101  
102  
103  
104

For peer review only

## 105 **METHODS**

### 107 **1. Study subjects**

108 This study was conducted using data from the 2013–2015 KNHANES, which is a  
109 national representative cross-sectional survey to assess health and nutritional status in the  
110 Korean population. It consists of a health interview, health examination, and a nutrition  
111 survey. A number of variables were collected by trained staff, including physicians, medical  
112 technicians, and dietitians. The detailed KNHANES survey method has already been  
113 described [7].

114 The food frequency questionnaire (FFQ) was changed to a dish-based semi-quantitative  
115 FFQ based on a 2012 survey. The survey assessed subjects 19–64 years of age. We used the  
116 sixth survey from 2013 to 2015 by sampling according to the survey cycle. This study  
117 included subjects  $\geq 25$  years. Additionally, the eligible study population included the  
118 respondents with data from all three parts of the survey. A total of 9,040 subjects (3,555  
119 males and 5,485 females) were included in the study.

### 121 **2. Fruit and vegetable intake**

122 The dish-based semi-quantitative FFQ was composed of 112 items and provided  
123 information on typical dietary consumption for 1 year using a 9-point scale (less than once  
124 per month or never, once per month, 2–3 times per month, once per week, 2–4 times per  
125 week, 5–6 times per week, once per day, twice per day, and three times per day) and three  
126 levels to represent the amount consumed by referring to a standard amount (less, standard,  
127 and more). Based on a previous study [4], we excluded pickled and salted vegetables,



1  
2  
3  
4 128 including kimchi and fruit juice. Vegetable intake included bean sprouts (seasoned, soup);  
5  
6 129 seasoned mung bean sprout; seasoned spinach; seasoned bellflower (boiled or not); pumpkin  
7  
8 130 (seasoned, pan-fried); other seasoned vegetables; cucumber (seasoned, raw); radish (seasoned,  
9  
10 131 pickled, dried); vegetable salad; seasoned green onion, and seasoned Chinese chives; raw  
11  
12 132 vegetables (lettuce, sesame, Chinese cabbage, and pumpkin leaf); green pepper; boiled  
13  
14 133 broccoli, boiled cabbage; garlic; tomato, and cherry tomato. Fruit intake was assessed based  
15  
16 134 on 12 items: strawberry; melon; watermelon; peach; grape; apple; pear; persimmon, dried  
17  
18 135 persimmon; tangerine; banana; orange; and kiwi. The frequency of fruit intake was used after  
19  
20 136 adjusting for seasonal fruit. Estimated intakes of fruits and vegetables were calculated on the  
21  
22 137 FFQ by multiplying the frequency of each food (as described above) by the selected amount  
23  
24 138 consumed: small (0.5), medium (1), and large (1.5). Fruit and vegetable intake was expressed  
25  
26 139 in four categories (< 1 time/d, 1 time/d, 2 times/d, and  $\geq 3$  times/d).  
27  
28  
29  
30  
31

### 32 141 **3. Outcome and covariate data**

33  
34 142 We used data from the health-related questionnaire for the diseases diagnosed by  
35  
36 143 physicians. We selected the questions about stroke, myocardial infarction, and angina pectoris  
37  
38 144 for the CVD-related diseases. If a subject answered “yes” to any of the three diseases, we  
39  
40 145 considered that the subject had CVD. Additionally, we separately considered subjects who  
41  
42 146 answered “yes” on the question about current illness with a physician’s diagnosis and those  
43  
44 147 who responded “yes” to a question about receiving treatment for a disease.  
45  
46

47 148 We used data on sex, age, quartiles of income, region (urban/rural), current smoker, and  
48  
49 149 survey year as covariates through a literature review [8] and the results of a univariate  
50  
51 150 analysis. We used quartile data for income instead of education level as a socioeconomic  
52  
53  
54  
55  
56  
57  
58  
59  
60

151 indicator because income may be directly linked to food purchases [9]. The question about  
152 physical activity was changed from the 2014 survey, so we did not consider physical activity.

153

#### 154 **4. Statistical analysis**

155 The basic characteristics of the study subjects are presented as weighted percentages or  
156 weighted means with standard errors by considering the multi-stage sampling survey method.  
157 The distributions of the basic characteristics according to fruit or vegetable intake level were  
158 assessed using the trend test under the random sampling condition. In the main analysis, CVD  
159 was considered the outcome (Y) and fruit or vegetable intake was considered an independent  
160 variable (X). Systolic blood pressure (SBP) ( $M_1$ ), total cholesterol ( $M_2$ ), and fasting glucose  
161 ( $M_3$ ) were applied as metabolic mediators (M). Additionally, BMI was considered as either a  
162 covariate or mediator.

163 We examined the association under the controlling covariates (sex, age, income, region  
164 [urban/rural], present smoking, and survey year) through four basic steps to assess mediation  
165 [10]. Step 1: association between dietary factors and CVD ( $X \rightarrow Y$ ; total effect and was  
166 marked path “c”); step 2: association between dietary factors and metabolic mediators ( $X \rightarrow$   
167  $M_i$ ; marked path “a”); step 3: association between metabolic mediators and CVD after  
168 controlling for metabolic mediators ( $M_i \rightarrow Y$ ; marked path “b”); and step 4: association  
169 between dietary factors and CVD disease after controlling for metabolic mediators (direct  
170 effect; marked path “c”). We used the bootstrap method and the “process” macro suggested  
171 by Andrew to assess the mediating effects [11]. In this analysis, we applied 10,000 bootstraps.  
172 We separately or simultaneously assessed the indirect effect of the metabolic mediators on the  
173 association between dietary factors and CVD. The exponential regression coefficient is equal

1  
2  
3  
4 174 to the odds ratio (OR) when considering the CVD as an outcome variable. The percentage of  
5  
6 175 risk mediated by the metabolic mediator was calculated as [12]:  $OR(\text{confounder adjusted}) -$   
7  
8 176  $OR(\text{confounder and mediator adjusted})/OR(\text{confounder adjusted}) - 1 \times 100.$   
9

10 177 All statistical analyses were conducted under a random sampling condition excluding the  
11  
12 178 basic characteristics given in Table 1 using SAS ver. 9.4 software (SAS Institute, Cary, NC,  
13  
14 179 USA). A two-sided  $p$ -value  $< 0.05$  was considered significant.  
15  
16  
17 180  
18  
19 181  
20  
21 182  
22  
23 183  
24  
25 184  
26  
27 185  
28  
29 186  
30  
31 187  
32  
33 188  
34  
35 189  
36  
37 190  
38  
39 191  
40  
41 192  
42  
43 193  
44  
45 194  
46  
47 195  
48  
49 196  
50  
51  
52  
53  
54  
55  
56  
57  
58  
59  
60

1  
2  
3  
4 197 **RESULTS**  
5  
6

7 198  
8  
9

10 199 The basic characteristics of the study subjects are presented in Table 1. Mean age was  
11  
12 200 43.7 years, and 1.81% of subjects had CVD. Subjects with a higher income ate more fruits or  
13  
14 201 vegetables than those with a lower income. Those who ate more fruit were more likely to be  
15  
16 202 non-smokers and female than their counterparts (Supplemental Tables 1, 2).  
17  
18

19 203 The total effect of fruit intake on CVD showed an inverse association without controlling  
20  
21 204 for metabolic mediators (adjusted odds ratio [aOR], 0.86, 95% CI: 0.74–0.98), but the effect  
22  
23 205 of vegetable intake was not significant (aOR, 0.93; 95% CI: 0.81–1.06) after controlling for  
24  
25 206 sex, age, income, region (urban/rural), current smoker, and survey year.  
26  
27

28 207 The direct effect of fruit intake on CVD was borderline significant after further  
29  
30 208 considering each metabolic mediator. The effect of SBP did not include zero in the 95% CI  
31  
32 209 range as the other metabolic mediators. The effect of fruit intake on BMI showed borderline  
33  
34 210 significance, and the effect of BMI on CVD was significant, but the indirect effect of BMI  
35  
36 211 was not significant. Additionally, the effect of SBP was significant even after controlling for  
37  
38 212 BMI as a covariate (Table 2). SBP, cholesterol, and BMI were associated with CVD, but  
39  
40 213 vegetable intake did not contribute to either metabolic mediator or CVD (Table 3). The  
41  
42 214 mediating effect of SBP on the association between fruit intake and outcome was dominant  
43  
44 215 even when the outcome was restricted to those with a current illness or undergoing treatment.  
45  
46  
47

48 216 The OR was attenuated to 0.89 (95% CI: 0.77–1.03) while simultaneously controlling for  
49  
50 217 multiple metabolic mediators, indicating a 21.4% indirect effect for CVD. SBP showed an  
51  
52 218 independent indirect effect. Higher fruit intake had a beneficial effect on fasting glucose, but  
53  
54

1  
2  
3  
4 219 its effect was not associated with CVD. The direct effect of fruit intake on CVD presented an  
5  
6 220 inverse association, but it did not reach statistical significance (Figure 1). In addition, similar  
7  
8 221 results were observed when adding BMI as covariate, with an OR of 0.90 (95% CI: 0.78–  
9  
10 222 1.04; data not shown).

11  
12  
13 223 We analyzed the serial mediator model to assess whether BMI influenced SBP (Figure 2).  
14  
15 224 Although the effect of fruit intake on BMI showed borderline significance, the influence of  
16  
17 225 BMI on SBP, and the effect of SBP on CVD reached statistical significance. Of the three  
18  
19 226 possible indirect paths, the fruit intake path → SBP → CVD was the only one to show an  
20  
21 227 independent association.

22  
23  
24  
25 228 Fruit intake was directly linked to subjects who suffered a stroke, but not ischemic heart  
26  
27 229 disease, regardless of which metabolic factors were controlled. In addition, the mediating  
28  
29 230 effect of SBP was dominant in patients who suffered a stroke or ischemic heart disease even  
30  
31 231 after controlling for BMI (Supplemental Tables 3, 4).

32  
33  
34 232

35  
36  
37 233

38  
39  
40 234

41  
42  
43 235

44  
45  
46 236

47  
48  
49 237

50  
51  
52 238

1  
2  
3  
4 239 **DISCUSSION**  
5  
6

7 240

8  
9 241 In this study, we assessed how fruit or vegetable intake is related to CVD by assessing  
10  
11 242 the indirect effect of metabolic mediators. Based on the established causal link, SBP, total  
12  
13 243 cholesterol, and fasting glucose were considered metabolic mediators, and the effect of BMI  
14  
15 244 was additionally assessed. Of them, the indirect effect of SBP on the relationship between  
16  
17 245 fruit intake and CVD was significant even after considering BMI, but not vegetable intake.  
18  
19 246 The indirect effect of the four metabolic factors accounted for 30.0% of the relationship  
20  
21 247 between fruit intake and CVD.  
22  
23

24 248 The beneficial effects of high fruit or vegetable intake on CVD and the unfavorable  
25  
26 249 effects of high blood pressure, glucose, and cholesterol on CVD are well known. Thus,  
27  
28 250 previous studies considered metabolic factors together, and mediators were reported to  
29  
30 251 attenuate the association of a direct effect [5]. One large prospective study conducted in 10  
31  
32 252 regions in China indicated that higher fresh fruit intake is linked to CVD death, and its effect  
33  
34 253 was attenuated by hazard ratios from 0.63 (95% CI: 0.56–0.72) to 0.70 (95% CI: 0.61–0.79)  
35  
36 254 after adjusting for BMI, blood pressure, glucose, and waist circumference [13]. Another study  
37  
38 255 conducted in Shanghai, China showed an attenuated association between fruit intake and  
39  
40 256 incident coronary heart disease after controlling for a history of diabetes, hypertension, or  
41  
42 257 dyslipidemia, but not vegetable intake [5]. A women's health study reported by Liu et al. also  
43  
44 258 showed that the effect of fruits and vegetables on CVD risk became stronger after excluding  
45  
46 259 subjects with a history of diabetes, hypertension, and high cholesterol [14]. However,  
47  
48 260 whether these metabolic factors were causal links between fruit and/or vegetable intake and  
49  
50 261 CVD risk was not investigated.  
51  
52  
53  
54

1  
2  
3  
4 262 The assessment of a mediating effect could help understand how fruit and/or vegetable  
5  
6 263 intake affects CVDs. In addition, an effect of poor dietary risk by metabolic mediators on  
7  
8 264 CVD was suggested by the GBD study, so that was considered to estimate the disease burden.  
9  
10 265 The meditating effect of blood pressure on the association between fruit and/or vegetable  
11  
12 266 intake and CVD was suggested by a prospective cohort study of patients in the first National  
13  
14 267 Health and Nutrition Examination Survey [8]. Blood pressure contributed 22.2% to the  
15  
16 268 relationship between fruit and vegetable intake and CVD death. This was similar to the  
17  
18 269 results adjusted for BMI, cholesterol, and blood pressure. That study also showed that the  
19  
20 270 direct effect of fruit and vegetable intake was notable in patients who suffered a stroke but  
21  
22 271 not those with ischemic heart disease. These results are in line with those of the present study.

23  
24  
25 272 We assessed a potential role for BMI on the association between fruit intake and CVD  
26  
27 273 using various models. Several reports, including the above-mentioned study, considered BMI  
28  
29 274 as a potential mediator [8, 13]. Additionally, a causal link between BMI and CVD risk is  
30  
31 275 mediated through metabolic factors. Two pooled studies of prospective cohorts assessed the  
32  
33 276 effect of BMI on coronary heart disease and stroke as mediated by metabolic components.  
34  
35 277 They reported that blood pressure was a more important mediator compared to cholesterol  
36  
37 278 and glucose [12, 15]. Other pooled data from an Asian cohort also indicate that estimated  
38  
39 279 mediating proportions through hypertension were 62.3, 35.7, and 92.4% for the association  
40  
41 280 between BMI and death due to CVD, coronary heart disease, and stroke, respectively, but not  
42  
43 281 by diabetes [16]. The GBD study restricted total calories to 2,000 kcal instead of considering  
44  
45 282 BMI [17]. In the present study, higher fruit intake was inversely associated with BMI, but it  
46  
47 283 was borderline significant ( $\beta = -0.06$ ,  $p = 0.08$ ), which affected the results of the fruit intake  
48  
49 284 path  $\rightarrow$  BMI  $\rightarrow$  SBP  $\rightarrow$  CVD in the serial multiple mediator model. Our study found that the  
50  
51  
52  
53  
54  
55  
56  
57  
58  
59  
60

1  
2  
3  
4 285 mediating effect due to BMI was about 7.9%, but previous studies showed a < 3.0%  
5  
6 286 mediating effect by BMI on the association between fruit only or fruit and vegetable intake  
7  
8 287 and CVD deaths by presenting little change in the adjusted risk value [8, 13]. However, it is  
9  
10 288 difficult to make a direct comparison due to discrepancies in study design, study populations,  
11  
12 289 the definition of disease, and fruit and/or vegetable intake.

14  
15 290 Eating more vegetables was not significantly associated with either a direct or indirect  
16  
17 291 effect. In Korea, vegetables in the general population are easily accessible by a side dish.  
18  
19 292 Indeed, statistics from the Organisation for Economic Co-operation and Development  
20  
21 293 (OECD) have reported that daily vegetable consumption among adults was the highest in  
22  
23 294 Korea [18]. However, the manner of preparation and/or cooking can influence nutrient  
24  
25 295 content [6]. The favorable effects of fruit and vegetable intake can be explained by nutrients,  
26  
27 296 such as dietary fiber, folate, potassium, and antioxidant vitamins (i.e., vitamin E, vitamin C,  
28  
29 297 polyphenols, flavonoids, and carotenoids) and other components. These nutrients might be  
30  
31 298 involved with controlling glucose, lipid level, and blood pressure, and reduce the risk of CVD  
32  
33 299 along with weight control [6]. However, because foods contain various nutrients, food  
34  
35 300 recommendations help subjects follow a prevention strategy. In addition, healthy eating is  
36  
37 301 also associated with other health behaviors, such as not smoking and regular physical activity  
38  
39 302 [8, 19].

40  
41  
42 303 The present study had some limitations. First, the results were derived from a cross-  
43  
44 304 sectional study design, so causal relationships could not be effectively drawn. But, some parts  
45  
46 305 of our results were consistent with previous studies [8, 19]. Furthermore, the results were  
47  
48 306 consistent even after applying various definitions of outcome. Because the survey conducts  
49  
50 307 general population except those in the hospital, subjects with diseases might be the relatively



1  
2  
3  
4 308 less moderate cases. In addition, unmeasured confounding factors may have influenced the  
5  
6 309 association.

7  
8 310 Nevertheless, our study focused on the mediating effects of metabolic factors on CVD  
9  
10 311 and assessed which metabolic factors affect CVD. Our results were produced using the  
11  
12 312 bootstrapping method and did not impose the assumption of normality of the sampling  
13  
14 313 distribution; thus, it was an appropriate design for multiple mediations [10]. The given  
15  
16 314 evidence was conceptually approached and was not statistically tested for an indirect effect.

17  
18  
19 315 Taken together, our study suggests that controlling SBP might lessen CVD risk, and a  
20  
21 316 diet rich in fruits can be used to regulate SBP, which, in turn, reduces CVD risk.

22  
23 317

24  
25 318

26  
27 319

28  
29 320

30  
31 321

32  
33 322

34  
35 323

36  
37 324

38  
39 325

40  
41 326

42  
43 327

44  
45 328

1  
2  
3  
4 329 **Conflict of interest statement**

5  
6  
7 330 None

8  
9  
10 331

11  
12 332 **Contributor ship statement**

13  
14  
15 333 HA Lee wrote the manuscript and performed the statistical analyses; D Lim, K Oh, and EJ Kim,  
16  
17 334 provided advice about writing the manuscript, and H Park helped interpret the data.

18  
19  
20 335

21  
22 336 **Funding statement**

23  
24  
25  
26 337 This study was supported by a grant of the Korean Health Technology R&D Project, Ministry of  
27  
28 338 Health & Welfare, Republic of Korea (HI13C0729).

29  
30  
31 339

32  
33 340 **Data availability**

34  
35  
36 341 The National Health and Nutrition Examination Survey files are available from the Korea Centers for Disease  
37  
38 342 Control and Prevention database (URL [https://knhanes.cdc.go.kr/knhanes/sub03/sub03\\_02\\_02.do](https://knhanes.cdc.go.kr/knhanes/sub03/sub03_02_02.do)). If you  
39  
40 343 register your e-mail on this site, you can freely download the raw data.

41  
42  
43 344

44  
45  
46 345

47  
48  
49 346

50  
51  
52 347

348 **REFERENCES**

349

- 350 1. World Health Organization (2017). Cardiovascular diseases Fact sheet.  
351 <http://www.who.int/mediacentre/factsheets/fs317/en/>. Accessed July 10, 2017.
- 352 2. Statistics Korea. Causes of Death Statistics in 2015.  
353 [http://kostat.go.kr/portal/eng/pressReleases/8/10/index.board?bmode=read&bSeq=&aSeq=35](http://kostat.go.kr/portal/eng/pressReleases/8/10/index.board?bmode=read&bSeq=&aSeq=357968&pageNo=1&rowNum=10&navCount=10&currPg=&sTarget=title&sTxt=)  
354 [7968&pageNo=1&rowNum=10&navCount=10&currPg=&sTarget=title&sTxt=](http://kostat.go.kr/portal/eng/pressReleases/8/10/index.board?bmode=read&bSeq=&aSeq=357968&pageNo=1&rowNum=10&navCount=10&currPg=&sTarget=title&sTxt=). Accessed  
355 July 10, 2017.
- 356 3. Feigin VL, Roth GA, Naghavi M, Parmar P, Krishnamurthi R, Chugh S, Mensah  
357 GA, Norrving B, Shiue I, Ng M, Estep K, Cercy K, Murray CJL, Forouzanfar MH; Global  
358 Burden of Diseases, Injuries and Risk Factors Study 2013 and Stroke Experts Writing Group.  
359 Global burden of stroke and risk factors in 188 countries, during 1990–2013: a systematic  
360 analysis for the Global Burden of Disease Study 2013. *Lancet Neurol* 2016;15(9):913-924.  
361 doi: 10.1016/S1474-4422(16)30073-4. Epub 2016 Jun 9.
- 362 4. GBD 2015 Risk Factors Collaborators Global, regional, and national comparative risk  
363 assessment of 79 behavioural, environmental and occupational, and metabolic risks or  
364 clusters of risks, 1990-2015: a systematic analysis for the Global Burden of Disease Study  
365 2015. *Lancet* 2016;388(10053):1659-1724. doi: 10.1016/S0140-6736(16)31679-8.
- 366 5. Danxia Yu, Xianglan Zhang ,Yu-Tang Gao, Honglan Li, Gong Yang, Jie Huang, Wei  
367 Zheng, Yong-Bing Xiang, and Xiao-Ou Shu. Fruit and Vegetable Intake and Risk of Coronary  
368 Heart Disease: Results from Prospective Cohort Studies of Chinese Adults in Shanghai. *Br J*  
369 *Nutr* 2014; 111(2): 353–362.
- 370 6. Bazzano LA. Dietary intake of fruit and vegetables and risk of diabetes mellitus and  
371 cardiovascular diseases. Geneva: World Health Organization, 2005.
- 372 7. Kweon S, Kim Y, Jang MJ, Kim Y, Kim K, Choi S, Chun C, Khang YH, Oh K. Data  
373 resource profile: the Korea National Health and Nutrition Examination Survey (KNHANES).  
374 *Int J Epidemiol* 2014;43(1):69-77. doi: 10.1093/ije/dyt228.
- 375 8. Bazzano LA, He J, Ogden LG, Loria CM, Vupputuri S, Myers L, Whelton PK. Fruit and  
376 vegetable intake and risk of cardiovascular disease in US adults: the first National Health and  
377 Nutrition Examination Survey Epidemiologic Follow-up Study. *Am J Clin*

- 378 *Nutr* 2002;76(1):93-9.
- 379 9. Darmon N, Drewnowski A. Does social class predict diet quality? *Am J Clin Nutr*  
380 2008;87(5):1107–1117.
- 381 10. Preacher KJ, Hayes AF. Asymptotic and resampling strategies for assessing and  
382 comparing indirect effects in multiple mediator models. *Behav Res Methods* 2008;40(3):879-  
383 91.
- 384 11. Andrew F. Hayes. Introduction to mediation, Moderation, and conditional process  
385 analysis: a regression-based approach. The Guilford Press, New York, 2013
- 386 12. Global Burden of Metabolic Risk Factors for Chronic Diseases Collaboration (BMI  
387 Mediated Effects), Lu Y, Hajifathalian K, Ezzati M, Woodward M, Rimm EB, Danaei G.  
388 Metabolic mediators of the effects of body-mass index, overweight, and obesity on coronary  
389 heart disease and stroke: a pooled analysis of 97 prospective cohorts with 1·8 million  
390 participants. *Lancet* 2014;383(9921):970-83. doi: 10.1016/S0140-6736(13)61836-X. Epub  
391 2013 Nov 22.
- 392 13. Huaidong Du, Liming Li., Derrick Bennett, Yu Guo, Timothy J. Key, Zheng Bian, Paul  
393 Sherliker, Haiyan Gao, Yiping Chen, Ling Yang, Junshi Chen, Shanqing Wang, Ranran  
394 Du, Hua Su, Rory Collins, Richard Peto, Zhengming Chen, for the China Kadoorie  
395 Biobank Study. Fresh Fruit Consumption and Major Cardiovascular Disease in China. *N*  
396 *Engl J Med* 2016; 374(14): 1332–1343.
- 397 14. Liu S, Manson JE, Lee IM, Cole SR, Hennekens CH, Willett WC, Buring JE. Fruit and  
398 vegetable intake and risk of cardiovascular disease: the Women's Health Study. *Am J Clin*  
399 *Nutr* 2000;72(4):922-8.
- 400 15. Lu Y, Hajifathalian K, Rimm EB, Ezzati M, Danaei G. Mediators of the Effect of Body  
401 Mass Index on Coronary Heart Disease: Decomposing Direct and Indirect Effects.  
402 *Epidemiology* 2015 ;26(2):153-62. doi: 10.1097/EDE.0000000000000234.
- 403 16. Chen Y, Copeland WK, Vedanthan R, Grant E, Lee JE, Gu D, Gupta PC, Ramadas  
404 K, Inoue M, Tsugane S, Tamakoshi A, Gao YT, Yuan JM, Shu XO, Ozasa K, Tsuji I, Kakizaki  
405 M, Tanaka H, Nishino Y, Chen CJ, Wang R, Yoo KY, Ahn YO, Ahsan H, Pan WH, Chen  
406 CS, Pednekar MS, Sauvaget C, Sasazuki S, Yang G, Koh WP, Xiang YB, Ohishi W, Watanabe  
407 T, Sugawara Y, Matsuo K, You SL, Park SK, Kim DH, Parvez F, Chuang SY, Ge W, Rolland  
408 B, McLerran D, Sinha R, Thornquist M, Kang D, Feng Z, Boffetta P, Zheng W, He J, Potter

1  
2  
3  
4 409 JD. Association between body mass index and cardiovascular disease mortality in east Asians  
5 410 and south Asians: pooled analysis of prospective data from the Asia Cohort Consortium.  
6  
7 411 *BMJ* 2013;347:f5446. doi: 10.1136/bmj.f5446.

8  
9 412 17. GBD 2013 Risk Factors Collaborators, Forouzanfar MH, Alexander L, Anderson  
10 413 HR, Bachman VF, Biryukov S, Brauer M, Burnett R, Casey D, Coates MM, et al. Global,  
11 414 regional, and national comparative risk assessment of 79 behavioural, environmental and  
12 415 occupational, and metabolic risks or clusters of risks in 188 countries, 1990–2013: a  
13 416 systematic analysis for the Global Burden of Disease Study 2013. *Lancet*  
14 417 2015;386(10010):2287-323. doi: 10.1016/S0140-6736(15)00128-2.

15 418 18. Organisation for Economic Co-operation and Development. Daily vegetable eating  
16 419 among adults, 2013 (or nearest year), in Health at a Glance 2015, OECD Publishing, Paris,  
17 420 2015. doi: [http://dx.doi.org/10.1787/health\\_glance-2015-graph42-en](http://dx.doi.org/10.1787/health_glance-2015-graph42-en).

18 421 19. Takachi R, Inoue M, Ishihara J, Kurahashi N, Iwasaki M, Sasazuki S, Iso H, Tsubono  
19 422 Y, Tsugane S; JPHC Study Group. Fruit and vegetable intake and risk of total cancer and  
20 423 cardiovascular disease: Japan Public Health Center-Based Prospective Study. *Am J*  
21 424 *Epidemiol* 2008;167(1):59-70.

22 425

23 426

24 427

25 428

26 429

27 430

28 431

29 432

30 433

31 434

1  
2  
3  
4 435 **Figure Legends**  
5  
6

7 436  
8

9  
10 437 Figure 1. The effect of multiple metabolic factor ( $M_i$ ) mediators in the association between  
11  
12 438 fruit intake (X) and cardiovascular diseases (Y).  
13

14  
15 439 <sup>a</sup> $p < 0.01$ , <sup>b</sup> $p < 0.001$ , SBP: systolic blood pressure. Coefficients were adjusted for sex, age,  
16  
17 440 income, region (urban/rural), current smoker, and survey year using the bootstrapping method.  
18

19 441  
20

21  
22 442 Figure 2. The effect of multiple serial mediators of metabolic factors ( $M_i$ ) in the association  
23  
24 443 between fruit intake (X) and cardiovascular diseases (Y).  
25

26  
27 444 <sup>a</sup> $p < 0.1$ , <sup>b</sup> $p < 0.05$ , <sup>c</sup> $p < 0.01$ , <sup>d</sup> $p < 0.001$ , BMI: body mass index, SBP: systolic blood pressure.  
28  
29 445 Coefficients were adjusted for sex, age, income, region (urban/rural), current smoker, and  
30  
31 446 survey year using the bootstrapping method.  
32

33 447  
34

35  
36 448  
37

38  
39 449  
40

41  
42 450  
43

44  
45 451  
46

47  
48 452  
49

50  
51 453  
52  
53  
54

454 Table 1. Basic characteristics of the study subjects.

|                                      | Weighted % (SE) |
|--------------------------------------|-----------------|
| <b>Sex</b>                           |                 |
| Male                                 | 49.92 (0.51)    |
| Female                               | 50.08 (0.51)    |
| <b>Age range</b>                     |                 |
| Age (years)†                         | 25–64 years     |
|                                      | 43.68 (0.18)    |
| <b>Region</b>                        |                 |
| Urban                                | 83.87 (1.52)    |
| Rural                                | 16.13 (1.52)    |
| <b>Income level (quartiles)</b>      |                 |
| Q1                                   | 23.46 (0.73)    |
| Q2                                   | 25.61 (0.72)    |
| Q3                                   | 25.03 (0.71)    |
| Q4                                   | 25.90 (0.97)    |
| <b>Current smoking</b>               |                 |
| No                                   | 75.83 (0.60)    |
| Yes                                  | 24.17 (0.60)    |
| <b>Disease</b>                       |                 |
| Cardiovascular disease               | 1.81 (0.16)     |
| Stroke                               | 0.98 (0.13)     |
| Ischemic heart disease               | 0.90 (0.10)     |
| <b>Metabolic Factors†</b>            |                 |
| Systolic blood pressure (mmHg)       | 115.01 (0.21)   |
| Total cholesterol (mg/dL)            | 190.98 (0.47)   |
| Fasting plasma glucose (mg/dL)       | 98.58 (0.30)    |
| Body mass index (kg/m <sup>2</sup> ) | 23.92 (0.05)    |

455

456 SE: Standard error.

457 †Weighted mean with standard error.

458

459

460

461

462

463

464

465

466 Table 2. The effect of metabolic mediators (M) in the association between fruit intake (X) and  
467 cardiovascular disease (Y).

| Metabolic<br>Factors (M) | Fruit intake |       |          |           |       |          |                               |       |          |                       |                |
|--------------------------|--------------|-------|----------|-----------|-------|----------|-------------------------------|-------|----------|-----------------------|----------------|
|                          | X → M (a)    |       |          | M → Y (b) |       |          | X → Y<br>(c' = direct effect) |       |          | Indirect effect (a*b) |                |
|                          | $\beta$      | SE    | <i>p</i> | $\beta$   | SE    | <i>p</i> | $\beta$                       | SE    | <i>p</i> | $\beta$               | 95% CI         |
| SBP <sup>a</sup>         | -0.484       | 0.144 | 0.001    | 0.013     | 0.004 | 0.002    | -0.137                        | 0.072 | 0.06     | -0.007                | -0.014 -0.002  |
| TC <sup>a</sup>          | -0.156       | 0.357 | 0.66     | -0.019    | 0.003 | <.0001   | -0.144                        | 0.075 | 0.05     | 0.003                 | -0.011 0.017   |
| FPG <sup>a</sup>         | -0.665       | 0.217 | <.01     | 0.004     | 0.003 | 0.20     | -0.144                        | 0.074 | 0.05     | -0.002                | -0.006 0.001   |
| BMI <sup>a</sup>         | -0.059       | 0.034 | 0.08     | 0.078     | 0.022 | 0.001    | -0.143                        | 0.072 | <.05     | -0.005                | -0.012 0.001   |
| SBP <sup>b</sup>         | -0.420       | 0.139 | <.01     | 0.011     | 0.005 | 0.01     | -0.127                        | 0.072 | 0.08     | -0.005                | -0.011 -0.0004 |
| TC <sup>b</sup>          | -0.064       | 0.352 | 0.86     | -0.019    | 0.003 | <.0001   | -0.126                        | 0.075 | 0.09     | 0.001                 | -0.012 0.015   |
| FPG <sup>b</sup>         | -0.614       | 0.214 | <.01     | 0.002     | 0.003 | 0.42     | -0.130                        | 0.074 | 0.08     | -0.002                | -0.005 0.002   |

468 SBP: systolic blood pressure, TC: total cholesterol, FPG: fasting plasma glucose, BMI: body mass  
469 index, SE: standard error, 95% CI: 95% confidence interval.

470  
471 <sup>a</sup>Adjusted for sex, age, income, region (urban/rural), current smoking, and survey year.

472 <sup>b</sup>Adjusted for sex, age, income, region (urban/rural), current smoking, survey year, and body mass  
473 index.

474

475

476

477

478

479

480

481

482

483

484

485

486

487



488 Table 3. The effect of metabolic mediators (M) in the association between vegetable intake  
 489 (X) and cardiovascular disease (Y).

| Metabolic<br>Factors (M) | Vegetable intake |       |          |           |       |          |                               |       |          |                       |              |
|--------------------------|------------------|-------|----------|-----------|-------|----------|-------------------------------|-------|----------|-----------------------|--------------|
|                          | X → M (a)        |       |          | M → Y (b) |       |          | X → Y<br>(c' = direct effect) |       |          | Indirect effect (a*b) |              |
|                          | $\beta$          | SE    | <i>p</i> | $\beta$   | SE    | <i>p</i> | $\beta$                       | SE    | <i>p</i> | $\beta$               | 95% CI       |
| SBP <sup>a</sup>         | -0.042           | 0.169 | 0.80     | 0.014     | 0.004 | 0.002    | -0.132                        | 0.086 | 0.13     | -0.001                | -0.006 0.004 |
| TC <sup>a</sup>          | 0.236            | 0.420 | 0.57     | -0.019    | 0.003 | <.0001   | -0.121                        | 0.089 | 0.18     | -0.005                | -0.021 0.012 |
| FPG <sup>a</sup>         | -0.054           | 0.256 | 0.83     | 0.004     | 0.003 | 0.18     | -0.132                        | 0.088 | 0.14     | -0.0002               | -0.003 0.002 |
| BMI <sup>a</sup>         | 0.057            | 0.040 | 0.16     | 0.080     | 0.022 | <.001    | -0.145                        | 0.086 | 0.09     | 0.005                 | -0.002 0.013 |
| SBP <sup>b</sup>         | -0.114           | 0.163 | 0.48     | 0.012     | 0.005 | 0.01     | -0.131                        | 0.086 | 0.13     | -0.001                | -0.006 0.002 |
| TC <sup>b</sup>          | 0.142            | 0.415 | 0.73     | -0.019    | 0.003 | <.0001   | -0.122                        | 0.089 | 0.17     | -0.003                | -0.019 0.014 |
| FPG <sup>b</sup>         | -0.121           | 0.252 | 0.63     | 0.003     | 0.003 | 0.4      | -0.132                        | 0.088 | 0.14     | -0.0003               | -0.003 0.002 |

490

491 SBP: systolic blood pressure, TC: total cholesterol, FPG: fasting plasma glucose, BMI: body mass  
 492 index, SE: standard error, 95% CI: 95% confidence interval.

493 <sup>a</sup>Adjusted for sex, age, income, region (urban/rural), current smoking, and survey year.

494 <sup>b</sup>Adjusted for sex, age, income, region (urban/rural), current smoking, survey year, and body mass  
 495 index.

496

497

498

499

500

501

502

503

504

505

506

507

508

Figure 1

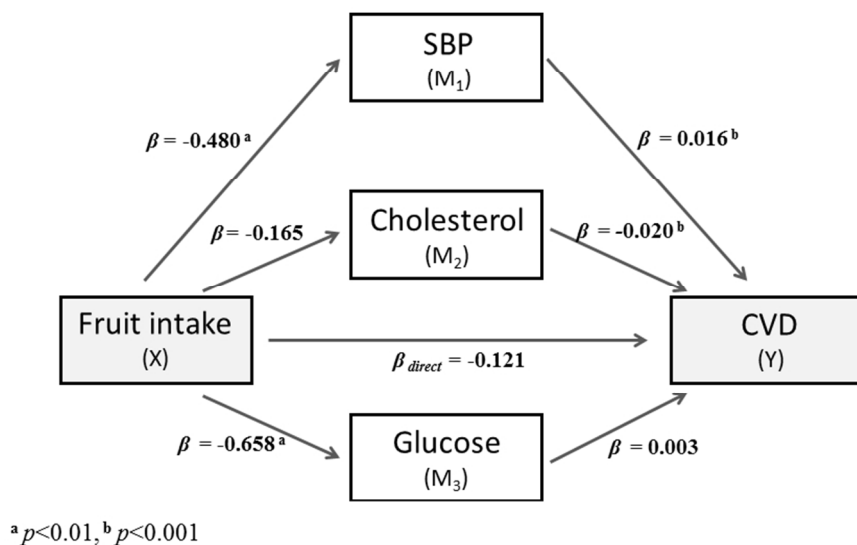

254x190mm (96 x 96 DPI)

1  
2  
3  
4  
5  
6  
7  
8  
9  
10  
11  
12  
13  
14  
15  
16  
17  
18  
19  
20  
21  
22  
23  
24  
25  
26  
27  
28  
29  
30  
31  
32  
33  
34  
35  
36  
37  
38  
39  
40  
41  
42  
43  
44  
45  
46  
47  
48  
49  
50  
51  
52  
53  
54  
55  
56  
57  
58  
59  
60

Figure 2

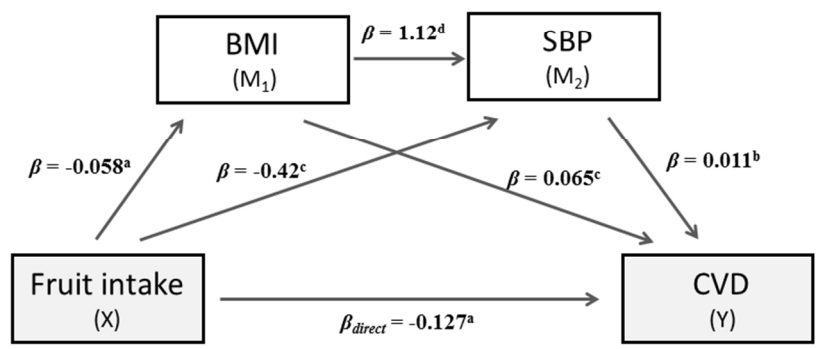

<sup>a</sup> $p < 0.1$ , <sup>b</sup> $p < 0.05$ , <sup>c</sup> $p < 0.01$ , <sup>d</sup> $p < 0.001$

254x190mm (96 x 96 DPI)

View Only

Supplemental Table 1. Distribution of basic characteristics by fruit intake.

|                                 | Fruit intake |       |            |       |             |       |              |       | <i>p</i> <sub>trend</sub> |
|---------------------------------|--------------|-------|------------|-------|-------------|-------|--------------|-------|---------------------------|
|                                 | < 1 time/day |       | 1 time/day |       | 2 times/day |       | 3+ times/day |       |                           |
|                                 | n            | %     | n          | %     | n           | %     | n            | %     |                           |
| <b>Survey year</b>              |              |       |            |       |             |       |              |       |                           |
| 2013                            | 961          | 29.61 | 935        | 28.8  | 629         | 19.38 | 721          | 22.21 | 0.03                      |
| 2014                            | 945          | 31.81 | 825        | 27.77 | 538         | 18.11 | 663          | 22.32 |                           |
| 2015                            | 916          | 32.45 | 810        | 28.69 | 488         | 17.29 | 609          | 21.57 |                           |
| <b>Sex</b>                      |              |       |            |       |             |       |              |       |                           |
| Male                            | 1519         | 42.73 | 983        | 27.65 | 551         | 15.5  | 502          | 14.12 | <.0001                    |
| Female                          | 1303         | 23.76 | 1587       | 28.93 | 1104        | 20.13 | 1491         | 27.18 |                           |
| <b>Age (years)</b>              | 45.83        | 10.97 | 45.38      | 10.94 | 45.76       | 10.69 | 46.53        | 10.81 | 0.02                      |
| <b>Region</b>                   |              |       |            |       |             |       |              |       |                           |
| Urban                           | 2280         | 30.62 | 2118       | 28.44 | 1389        | 18.65 | 1660         | 22.29 | <.01                      |
| Rural                           | 542          | 34.02 | 452        | 28.37 | 266         | 16.7  | 333          | 20.9  |                           |
| <b>Income level (quartiles)</b> |              |       |            |       |             |       |              |       |                           |
| Q1                              | 863          | 40.29 | 574        | 26.8  | 354         | 16.53 | 351          | 16.39 | <.0001                    |
| Q2                              | 827          | 36.38 | 634        | 27.89 | 359         | 15.79 | 453          | 19.93 |                           |
| Q3                              | 612          | 26.9  | 702        | 30.86 | 435         | 19.12 | 526          | 23.12 |                           |
| Q4                              | 510          | 22.02 | 649        | 28.02 | 500         | 21.59 | 657          | 28.37 |                           |
| <b>Current smoking</b>          |              |       |            |       |             |       |              |       |                           |
| No smoking                      | 1826         | 26.21 | 2030       | 29.14 | 1377        | 19.77 | 1733         | 24.88 | <.0001                    |
| Smoking                         | 833          | 50.24 | 431        | 26    | 210         | 12.67 | 184          | 11.1  |                           |

Supplemental Table 2. Distribution of basic characteristics by vegetable intake.

|                                 | Vegetable intake |       |            |       |             |       |              |       | <i>p</i> <sub>trend</sub> |
|---------------------------------|------------------|-------|------------|-------|-------------|-------|--------------|-------|---------------------------|
|                                 | < 1 time/day     |       | 1 time/day |       | 2 times/day |       | 3+ times/day |       |                           |
|                                 | n                | %     | n          | %     | n           | %     | n            | %     |                           |
| <b>Survey year</b>              |                  |       |            |       |             |       |              |       |                           |
| 2013                            | 357              | 11    | 711        | 21.9  | 674         | 20.76 | 1504         | 46.33 | <.0001                    |
| 2014                            | 374              | 12.59 | 725        | 24.4  | 585         | 19.69 | 1287         | 43.32 |                           |
| 2015                            | 382              | 13.53 | 724        | 25.65 | 574         | 20.33 | 1143         | 40.49 |                           |
| <b>Sex</b>                      |                  |       |            |       |             |       |              |       |                           |
| Male                            | 428              | 12.04 | 892        | 25.09 | 709         | 19.94 | 1526         | 42.93 | 0.38                      |
| Female                          | 685              | 12.49 | 1268       | 23.12 | 1124        | 20.49 | 2408         | 43.9  |                           |
| <b>Age (years)</b>              | 45.54            | 11.70 | 45.11      | 10.93 | 45.49       | 10.93 | 46.49        | 10.55 | <.0001                    |
| <b>Region</b>                   |                  |       |            |       |             |       |              |       |                           |
| Urban                           | 910              | 12.22 | 1775       | 23.84 | 1526        | 20.49 | 3236         | 43.45 | 0.73                      |
| Rural                           | 203              | 12.74 | 385        | 24.17 | 307         | 19.27 | 698          | 43.82 |                           |
| <b>Income level (quartiles)</b> |                  |       |            |       |             |       |              |       |                           |
| Q1                              | 182              | 21.19 | 221        | 25.73 | 133         | 15.48 | 323          | 37.6  | <.0001                    |
| Q2                              | 337              | 15.56 | 546        | 25.21 | 438         | 20.22 | 845          | 39.01 |                           |
| Q3                              | 325              | 11.33 | 708        | 24.68 | 612         | 21.33 | 1224         | 42.66 |                           |
| Q4                              | 264              | 8.48  | 677        | 21.75 | 642         | 20.63 | 1529         | 49.13 |                           |
| <b>Current smoker</b>           |                  |       |            |       |             |       |              |       |                           |
| No                              | 810              | 11.63 | 1668       | 23.94 | 1421        | 20.4  | 3067         | 44.03 | <.01                      |
| Yes                             | 248              | 14.96 | 392        | 23.64 | 325         | 19.6  | 693          | 41.8  |                           |

Supplemental Table 3. The effect of metabolic mediators (M) in the association between fruit intake (X) and stroke (Y).

| Metabolic Factors (M) | Fruit intake |       |          |           |       |          |                            |       |          |                       |               |
|-----------------------|--------------|-------|----------|-----------|-------|----------|----------------------------|-------|----------|-----------------------|---------------|
|                       | X → M (a)    |       |          | M → Y (b) |       |          | X → Y (c' = direct effect) |       |          | Indirect effect (a*b) |               |
|                       | $\beta$      | SE    | <i>p</i> | $\beta$   | SE    | <i>p</i> | $\beta$                    | SE    | <i>p</i> | $\beta$               | 95% CI        |
| SBP <sup>a</sup>      | -0.484       | 0.144 | <.001    | 0.015     | 0.006 | <.01     | -0.242                     | 0.100 | 0.02     | -0.007                | -0.017 -0.001 |
| TC <sup>a</sup>       | -0.156       | 0.357 | 0.66     | -0.018    | 0.003 | <.0001   | -0.268                     | 0.105 | 0.01     | 0.003                 | -0.009 0.016  |
| FPG <sup>a</sup>      | -0.665       | 0.217 | <.01     | 0.005     | 0.004 | 0.19     | -0.269                     | 0.105 | 0.01     | -0.003                | -0.008 0.002  |
| BMI <sup>a</sup>      | -0.059       | 0.034 | 0.08     | 0.074     | 0.029 | 0.01     | -0.249                     | 0.100 | 0.01     | -0.004                | -0.013 0.001  |
| SBP <sup>b</sup>      | -0.420       | 0.139 | <.01     | 0.013     | 0.006 | 0.03     | -0.238                     | 0.100 | 0.02     | -0.005                | -0.014 0.001  |
| TC <sup>b</sup>       | -0.064       | 0.352 | 0.86     | -0.018    | 0.003 | <.0001   | -0.255                     | 0.105 | 0.02     | 0.001                 | -0.011 0.015  |
| FPG <sup>b</sup>      | -0.614       | 0.214 | <.01     | 0.003     | 0.004 | 0.37     | -0.260                     | 0.105 | 0.01     | -0.002                | -0.007 0.004  |

SBP: systolic blood pressure, TC: total cholesterol, FPG: fasting plasma glucose, BMI: body mass index, SE: standard error, 95% CI: 95% confidence interval.

<sup>a</sup>Adjusted for sex, age, income, region (urban/rural), current smoking, and survey year.

<sup>b</sup>Adjusted for sex, age, income, region (urban/rural), current smoking, survey year, and body mass index.

Supplemental Table 4. The effect of metabolic mediators (M) in the association between fruit intake (X) and ischemic heart disease (Y).

| Metabolic Factors (M) | Fruit intake |       |          |           |       |          |                            |       |          |                       |                |
|-----------------------|--------------|-------|----------|-----------|-------|----------|----------------------------|-------|----------|-----------------------|----------------|
|                       | X → M (a)    |       |          | M → Y (b) |       |          | X → Y (c' = direct effect) |       |          | Indirect effect (a*b) |                |
|                       | $\beta$      | SE    | <i>p</i> | $\beta$   | SE    | <i>p</i> | $\beta$                    | SE    | <i>p</i> | $\beta$               | 95% CI         |
| SBP <sup>a</sup>      | -0.484       | 0.144 | <.001    | 0.011     | 0.006 | 0.06     | -0.065                     | 0.097 | 0.51     | -0.006                | -0.013 -0.0001 |
| TC <sup>a</sup>       | -0.156       | 0.357 | 0.66     | -0.021    | 0.003 | <.0001   | -0.042                     | 0.100 | 0.67     | 0.003                 | -0.012 0.019   |
| FPG <sup>a</sup>      | -0.665       | 0.217 | <.01     | 0.002     | 0.004 | 0.65     | -0.048                     | 0.099 | 0.63     | -0.001                | -0.006 0.004   |
| BMI <sup>a</sup>      | -0.059       | 0.034 | 0.08     | 0.079     | 0.031 | 0.01     | -0.069                     | 0.097 | 0.48     | -0.005                | -0.012 0.001   |
| SBP <sup>b</sup>      | -0.420       | 0.139 | <.01     | 0.010     | 0.006 | 0.12     | -0.047                     | 0.097 | 0.63     | -0.004                | -0.011 0.001   |
| TC <sup>b</sup>       | -0.064       | 0.352 | 0.86     | -0.020    | 0.003 | <.0001   | -0.018                     | 0.100 | 0.86     | 0.001                 | -0.013 0.016   |
| FPG <sup>b</sup>      | -0.614       | 0.214 | <.01     | 0.001     | 0.004 | 0.88     | -0.028                     | 0.099 | 0.78     | 0.000                 | -0.004 0.005   |

SBP: systolic blood pressure, TC: total cholesterol, FPG: fasting plasma glucose, BMI: body mass index, SE: standard error, 95% CI: 95% confidence interval.

<sup>a</sup>Adjusted for sex, age, income, region (urban/rural), current smoking, and survey year.

<sup>b</sup>Adjusted for sex, age, income, region (urban/rural), current smoking, survey year, and body mass index.

# BMJ Open

## The mediating effects of metabolic factors on the association between fruit or vegetable intake and cardiovascular disease: the Korean National Health and Nutrition Examination Survey

|                                 |                                                                                                                                                                                                                                                                                                                                                                                                                            |
|---------------------------------|----------------------------------------------------------------------------------------------------------------------------------------------------------------------------------------------------------------------------------------------------------------------------------------------------------------------------------------------------------------------------------------------------------------------------|
| Journal:                        | <i>BMJ Open</i>                                                                                                                                                                                                                                                                                                                                                                                                            |
| Manuscript ID                   | bmjopen-2017-019620.R1                                                                                                                                                                                                                                                                                                                                                                                                     |
| Article Type:                   | Research                                                                                                                                                                                                                                                                                                                                                                                                                   |
| Date Submitted by the Author:   | 22-Dec-2017                                                                                                                                                                                                                                                                                                                                                                                                                |
| Complete List of Authors:       | Lee, Hye Ah; Mokdong Hospital, Ewha Womans University, Clinical Trial Center<br>Lim, Dohee; Korea Centers for Disease Control and Prevention<br>Oh, Kyungwon ; Korea Centers for Disease Control and Prevention, Division of Health and Nutrition Survey<br>Kim, Eun Jung ; Pyeongtaek University, Department of Nursing<br>Park, Hyesook; College of Medicine, Ewha Womans University, Department of preventive medicine, |
| <b>Primary Subject Heading</b>: | Public health                                                                                                                                                                                                                                                                                                                                                                                                              |
| Secondary Subject Heading:      | Epidemiology                                                                                                                                                                                                                                                                                                                                                                                                               |
| Keywords:                       | Cardiovascular disease, blood pressure, NUTRITION & DIETETICS                                                                                                                                                                                                                                                                                                                                                              |
|                                 |                                                                                                                                                                                                                                                                                                                                                                                                                            |

SCHOLARONE™  
Manuscripts



1  
2  
3  
4 1 **The mediating effects of metabolic factors on the association between fruit or vegetable**  
5  
6 2 **intake and cardiovascular disease: the Korean National Health and Nutrition**  
7  
8 3 **Examination Survey**  
9  
10  
11 4

14 5 Hye Ah Lee<sup>1</sup>, Dohee Lim<sup>2</sup>, Kyungwon Oh<sup>2</sup>, Eun Jung Kim<sup>3</sup>,

16 6 Hyesook Park<sup>4</sup>

18 7 <sup>1</sup>Clinical Trial Center, Mokdong Hospital, Ewha Womans University, Seoul, <sup>2</sup>Division of  
19 8 Health and Nutrition Survey, Korea Centers for Disease Control and Prevention, Cheongwon-  
20 9 gun, <sup>3</sup>Department of Nursing, Pyeongtaek University, Pyeongtaek, <sup>4</sup>Department of preventive  
21 10 medicine, College of Medicine, Ewha Womans University, Seoul, Korea  
22  
23  
24  
25  
26  
27  
28  
29  
30  
31  
32  
33  
34

35 14 **Address for corresponding author:** Hyesook Park, MD, Ph.D.

38 15 Department of Preventive Medicine, School of Medicine, Ewha Womans University, 1071,  
39 16 Anyangcheon-ro, Yangcheon-ku, Seoul 158-710, Republic of Korea  
40  
41  
42

43 17 Tel : +82.2-2650-5756, Fax: +82.2-2652-8325  
44  
45

46 18 E-mail : [hpark@ewha.ac.kr](mailto:hpark@ewha.ac.kr)  
47  
48  
49  
50  
51

52 20 **Word count:** 2,911  
53  
54

1  
2  
3  
4 21 **Abstract**

5  
6  
7 22 **Objective:** We assessed the mediating effects of metabolic components on the relationship  
8  
9 23 between fruit or vegetable intake and cardiovascular disease (CVD).

10  
11  
12 24 **Design:** Cross-sectional study

13  
14  
15 25 **Setting:** This study was conducted using data from the 2013–2015 Korean National Health  
16  
17 26 and Nutrition Examination Survey, which is a national representative cross-sectional survey  
18  
19 27 to assess health and nutritional status in the Korean population.

20  
21  
22 28 **Method and analysis:** A total of 9,040 subjects (3,555 males and 5,485 females) aged  $\geq 25$   
23  
24 29 years were included in the study. Physician-diagnosed CVD via self-report was used as the  
25  
26 30 outcome. Fruit or vegetable intake was measured via a dish-based semi-quantitative food  
27  
28 31 frequency questionnaire and grouped into categories ( $< 1$  time/d, 1 time/d, 2 times/d, and  $\geq 3$   
29  
30 32 times/d). Systolic blood pressure (SBP), cholesterol, and fasting glucose were considered  
31  
32 33 metabolic mediators, and the bootstrap method was used to assess mediating effect.

33  
34  
35 34 **Results:** About 1.8% of adults aged 25–64years had CVD. The risk for CVD decreased by  
36  
37 35 14% as fruit, but not vegetable, intake was increased by one unit per day. After additional  
38  
39 36 adjustment for metabolic factors, the odds ratio was attenuated to 0.89 (95% confidence  
40  
41 37 interval; 0.77–1.03). This result indicates that the indirect effect of three metabolic factors  
42  
43 38 accounted for 21.4% of the relationship between fruit intake and CVD. SBP was a more  
44  
45 39 important metabolic mediator than the other factors. The indirect effect accounted for 30.0%  
46  
47 40 when body mass index was additionally controlled as a mediator, and SBP still had an  
48  
49 41 independent effect compared to the other mediators.

1  
2  
3  
4 42 **Conclusions:** Our results indicate that controlling SBP may lessen the CVD risk, and a diet  
5  
6 43 rich in fruits can regulate SBP, which, in turn, reduces CVD risk.  
7  
8

9 44 **Keywords:** Cardiovascular disease, blood pressure, diet  
10  
11  
12 45  
13  
14

## 15 46 **ARTICLE SUMMARY**

16  
17 47  
18

### 19 48 **Strengths and limitations of this study**

- 20  
21 49 - In this study, we assessed how fruit or vegetable intake is related to cardiovascular  
22  
23 50 disease by assessing the indirect effect of systolic blood pressure, total cholesterol, and  
24  
25 51 fasting glucose, including body mass index. This topic was a less interesting part so far,  
26  
27 52 so the study has scientific value.  
28  
29  
30 53 - Using national representative data source, we sought to generalize the research findings.  
31  
32 54 - But, this results were derived from a cross-sectional study design, so causal  
33  
34 55 relationships could not be effectively drawn. Therefore, it is necessary to pay attention  
35  
36 56 to interpretation of research results.  
37  
38  
39 57  
40  
41 58  
42  
43 59  
44  
45 60  
46  
47 61  
48  
49 62  
50  
51 63  
52  
53  
54  
55  
56  
57  
58  
59  
60

## 64 INTRODUCTION

65  
66 Cardiovascular diseases (CVDs) are responsible for mortality worldwide; a report from  
67 the World Health Organization stated that CVDs accounted for 31% of all deaths worldwide  
68 in 2015 [1]. Although mortality from ischemic heart disease has shown a flat trend and that  
69 from cerebrovascular disease has shown a declining trend in the Republic of Korea since  
70 2005, these causes of death remain highly ranked [2].

71 Several risk factors for CVDs, including metabolic factors, such as high glucose, high  
72 blood pressure, and high cholesterol, have been suggested [3]. Several studies have suggested  
73 that these metabolic factors are also linked to risk factors (e.g., body mass index [BMI] and  
74 dietary factors) and CVD risk as mediators [4, 5]. The causal link between these mediators  
75 and disease risk must be identified for an effective public health intervention. The mediators  
76 can help explain how intervention of risk factors works. However, previous studies focused  
77 on a single relationship between a risk factor and a disease rather than the mediating effects.

78 Excessive risk for CVD caused by poor diet and chronic diseases was reported from a  
79 study of global burden of disease (GBD). In addition, the GBD study established possible  
80 causal mediating relationships between a diet poor in fruits or vegetables, metabolic  
81 mediators (blood pressure, cholesterol, and glucose), and disease [4]. Moreover, a recent  
82 meta-analysis reported that the beneficial effects of fruits and vegetables intake were also  
83 shown in CVD, as well as in cancer and all-cause mortality [6]. The metabolic mediators  
84 mentioned above have also been linked to BMI and CVD [4]. The effect of a diet rich in  
85 fruits and vegetables on BMI has been reported through epidemiological studies [7], but few  
86 studies have assessed BMI as a mediator.

1  
2  
3  
4 87        There is a need to study the degree to which these metabolic factors contribute to the  
5  
6 88        relationship between risk factors and disease. Although the evidence for the association  
7  
8 89        between fruit/vegetable intake and CVD is relatively strong [8, 9], clarifying the potential  
9  
10 90        biological pathway mechanisms could substantially add to our knowledge. Thus, using cross-  
11  
12 91        sectional survey data from the 2013–2015 Korean National Health and Nutrition Examination  
13  
14 92        Survey (KNHANES), we assessed the mediating effects of metabolic components applied to  
15  
16 93        a confirmatory model. Furthermore, we assessed how the BMI contributes to the relationship  
17  
18 94        between fruit or vegetable intake and CVD as a confounder or mediator.  
19  
20  
21 95  
22  
23 96  
24  
25  
26 97  
27  
28  
29 98  
30  
31  
32 99  
33  
34  
35 100  
36  
37  
38 101  
39  
40  
41 102  
42  
43  
44 103  
45  
46  
47 104  
48  
49  
50 105  
51  
52  
53 106

## 107 **METHODS**

### 109 **1. Study subjects**

110 This study was conducted using data from the 2013–2015 KNHANES, which is a  
111 national representative cross-sectional survey to assess health and nutritional status in the  
112 Korean population (response rate=78.3%). It consists of a health interview, health  
113 examination, and a nutrition survey. A number of variables were collected by trained staff,  
114 including physicians, medical technicians, and dieticians. The detailed KNHANES survey  
115 method has already been described [10].

116 The food frequency questionnaire (FFQ) was changed to a dish-based semi-quantitative  
117 FFQ based on a 2012 survey. The survey assessed subjects 19–64 years of age. Details  
118 regarding the development process and validation results of the FFQ tool have been  
119 previously published elsewhere [11, 12]. We used the sixth survey from 2013 to 2015 by  
120 sampling according to the survey cycle. This study included subjects  $\geq 25$  years.  
121 Additionally, the eligible study population included the respondents with data from all three  
122 parts of the survey. Of the subjects aged 25-64 who participated in the survey (n=12,258), 73.7%  
123 participated in all three parts of the survey. A total of 9,040 subjects (3,555 males and 5,485  
124 females) were included in the study. The study protocol was approved by the Institutional  
125 Review Board of the Ewha Womans University Hospital.

### 127 **2. Fruit and vegetable intake**

128 The dish-based semi-quantitative FFQ was composed of 112 items and provided  
129 information on typical dietary consumption for 1 year using a 9-point scale (less than once

1  
2  
3  
4 130 per month or never, once per month, 2–3 times per month, once per week, 2–4 times per  
5  
6 131 week, 5–6 times per week, once per day, twice per day, and three times per day) and three  
7  
8 132 levels to represent the amount consumed by referring to a standard amount (less, standard,  
9  
10 133 and more). Based on a previous study [4], we excluded pickled and salted vegetables, kimchi,  
11  
12 134 and fruit juice. Vegetable intake and fruit intake were evaluated based on 15 items and 12  
13  
14 135 items, respectively (Supplemental Tables 1). The frequency of fruit intake was used after  
15  
16 136 adjusting for seasonal fruit. Estimated intakes of fruits and vegetables were calculated on the  
17  
18 137 FFQ by multiplying the frequency of each food (as described above) by the selected amount  
19  
20 138 consumed: small (0.5), medium (1), and large (1.5). Fruit and vegetable intake was expressed  
21  
22 139 in four categories (< 1 time/d, 1 time/d, 2 times/d, and  $\geq 3$  times/d).  
23  
24  
25  
26  
27

### 141 **3. Outcome and covariate data**

142 We used data from the health-related questionnaire for the diseases diagnosed by  
143 physicians. We selected the questions about stroke, myocardial infarction, and angina pectoris  
144 for the CVD-related diseases. If a subject answered “yes” to any of the three diseases, we  
145 considered that the subject had CVD. Additionally, we separately considered subjects who  
146 answered “yes” on the question about current illness with a physician’s diagnosis and those  
147 who responded “yes” to a question about receiving treatment for a disease.

148 Using the measured height and weight information, BMI was calculated in units of  $\text{kg}/\text{m}^2$ .  
149 Blood pressure was measured three times in total and the average value of the second and  
150 third measurements was used. Total cholesterol and glucose were measured by taking blood  
151 from fasting state.

152 We used data on sex, age, quartiles of income, region (urban/rural), current smoker, and

1  
2  
3  
4 153 survey year as covariates through a literature review [13] and the results of a univariate  
5  
6 154 analysis. We used quartile data for income instead of education level as a socioeconomic  
7  
8 155 indicator because income may be directly linked to food purchases [14]. The question about  
9  
10 156 physical activity was changed from the 2014 survey, so we did not consider physical activity.  
11  
12  
13  
14

#### 15 158 **4. Statistical analysis**

16  
17 159 The basic characteristics of the study subjects are presented as weighted percentages or  
18  
19 160 weighted means with standard errors by considering the multi-stage sampling survey method.  
20  
21 161 The distributions of the basic characteristics according to fruit or vegetable intake level were  
22  
23 162 assessed using the trend test under the random sampling condition. In the main analysis, CVD  
24  
25 163 was considered the outcome (Y) and fruit or vegetable intake was considered an independent  
26  
27 164 variable (X). Systolic blood pressure (SBP) ( $M_1$ ), total cholesterol ( $M_2$ ), and fasting glucose  
28  
29 165 ( $M_3$ ) were applied as metabolic mediators (M). Additionally, BMI was considered as either a  
30  
31 166 covariate or mediator.  
32  
33

34 167 We examined the association under the controlling covariates (sex, age, income, region  
35  
36 168 [urban/rural], present smoking, and survey year) through four basic steps to assess mediation  
37  
38 169 [15]. Step 1: association between dietary factors and CVD ( $X \rightarrow Y$ ; total effect and was  
39  
40 170 marked path “c”); step 2: association between dietary factors and metabolic mediators ( $X \rightarrow$   
41  
42 171  $M_i$ ; marked path “a”); step 3: association between metabolic mediators and CVD after  
43  
44 172 controlling for metabolic mediators ( $M_i \rightarrow Y$ ; marked path “b”); and step 4: association  
45  
46 173 between dietary factors and CVD disease after controlling for metabolic mediators (direct  
47  
48 174 effect; marked path “c”). We used the bootstrap method and the “process” macro (ver.  
49  
50 175 V2.16.3) suggested by Andrew to assess the mediating effects [16]. In this analysis, we  
51  
52  
53  
54  
55  
56  
57  
58  
59  
60



1  
2  
3  
4 176 applied 10,000 bootstraps. We separately or simultaneously assessed the indirect effect of the  
5  
6 177 metabolic mediators on the association between dietary factors and CVD. The exponential  
7  
8 178 regression coefficient is equal to the odds ratio (OR) when considering the CVD as an  
9  
10 179 outcome variable. The percentage of risk mediated by the metabolic mediator was calculated  
11  
12 180 as [17]:  $OR(\text{confounder adjusted}) - OR(\text{confounder and mediator adjusted}) / OR(\text{confounder}$   
13  
14 181  $\text{adjusted}) - 1 \times 100$ .

15  
16  
17 182 All statistical analyses were conducted under a random sampling condition excluding the  
18  
19 183 basic characteristics given in Table 1 using SAS ver. 9.4 software (SAS Institute, Cary, NC,  
20  
21 184 USA). A two-sided  $p$ -value  $< 0.05$  was considered significant.  
22

23 185

24 186

25 187

26 188

27 189

28 190

29 191

30 192

31 193

32 194

33 195

34 196

35 197

36 198

1  
2  
3  
4 199 **RESULTS**  
5  
6

7 200

8  
9  
10 201 The basic characteristics of the study subjects are presented in Table 1. Mean age was  
11  
12 202 43.7 years, and 1.81% of subjects (n=189) had CVD. In addition, 0.98% and 0.90% of  
13  
14 203 subject had stroke (n=102) and ischemic heart disease (n=97), respectively. Subjects with a  
15  
16 204 higher income ate more fruits or vegetables than those with a lower income. Those who ate  
17  
18 205 more fruit were more likely to be non-smokers and female than their counterparts  
19  
20 206 (Supplemental Tables 2, 3).  
21  
22

23 207 The total effect of fruit intake on CVD showed an inverse association without controlling  
24  
25 208 for metabolic mediators (adjusted odds ratio [aOR], 0.86, 95% CI: 0.74–0.98), but the effect  
26  
27 209 of vegetable intake was not significant (aOR, 0.93; 95% CI: 0.81–1.06) after controlling for  
28  
29 210 sex, age, income, region (urban/rural), current smoker, and survey year.  
30  
31

32  
33 211 The direct effect of fruit intake on CVD was borderline significant after further  
34  
35 212 considering each metabolic mediator. The effect of SBP did not include zero in the 95% CI  
36  
37 213 range as the other metabolic mediators. The effect of fruit intake on BMI showed borderline  
38  
39 214 significance, and the effect of BMI on CVD was significant, but the indirect effect of BMI  
40  
41 215 was not significant. Additionally, the effect of SBP was significant even after controlling for  
42  
43 216 BMI as a covariate (Table 2). SBP, cholesterol, and BMI were associated with CVD, but  
44  
45 217 vegetable intake did not contribute to either metabolic mediator or CVD (Table 3). The  
46  
47 218 mediating effect of SBP on the association between fruit intake and outcome was dominant  
48  
49 219 even when the outcome was restricted to those with a current illness or undergoing treatment.  
50  
51

52  
53 220 The OR was attenuated to 0.89 (95% CI: 0.77–1.03) while simultaneously controlling for  
54

1  
2  
3  
4 221 multiple metabolic mediators, indicating a 21.4% indirect effect for CVD (i.e.  $(0.8555-$   
5  
6 222  $0.8864)/(0.8555-1)*100=21.4\%$ ). SBP showed an independent indirect effect. Higher fruit  
7  
8 223 intake had a beneficial effect on fasting glucose, but its effect was not associated with CVD.  
9  
10 224 The direct effect of fruit intake on CVD presented an inverse association, but it did not reach  
11  
12 225 statistical significance (Figure 1). In addition, similar results were observed when adding  
13  
14 226 BMI as covariate, with an OR of 0.90 (95% CI: 0.78–1.04; data not shown).

17 227 We analyzed the serial mediator model to assess whether BMI influenced SBP (Figure 2).  
18  
19 228 Although the effect of fruit intake on BMI showed borderline significance, the influence of  
20  
21 229 BMI on SBP, and the effect of SBP on CVD reached statistical significance. Of the three  
22  
23 230 possible indirect paths, the fruit intake path  $\rightarrow$  SBP  $\rightarrow$  CVD was the only one to show an  
24  
25 231 independent association.

29 232 Fruit intake was directly linked to subjects who suffered a stroke, but not ischemic heart  
30  
31 233 disease, regardless of which metabolic factors were controlled. In addition, the mediating  
32  
33 234 effect of SBP was dominant in patients who suffered a stroke or ischemic heart disease even  
34  
35 235 after controlling for BMI (Supplemental Tables 4, 5).

38 236

41 237

44 238

47 239

50 240

53 241

1  
2  
3  
4 242 **DISCUSSION**  
5  
6

7 243

8  
9 244 In this study, we assessed how fruit or vegetable intake is related to CVD by assessing  
10  
11 245 the indirect effect of metabolic mediators. Based on the suggested causal link, SBP, total  
12  
13 246 cholesterol, and fasting glucose were considered metabolic mediators, and the effect of BMI  
14  
15 247 was additionally assessed. Of them, the indirect effect of SBP on the relationship between  
16  
17 248 fruit intake and CVD was significant even after considering BMI, but not vegetable intake.  
18  
19 249 The indirect effect of the four metabolic factors accounted for 30.0% of the relationship  
20  
21  
22 250 between fruit intake and CVD (i.e.  $(0.8555-0.8989)/(0.8555-1)*100=30.0\%$ ).  
23

24 251 The beneficial effects of high fruit or vegetable intake on CVD and the unfavorable  
25  
26 252 effects of high blood pressure, glucose, and cholesterol on CVD are well known. Thus,  
27  
28 253 previous studies considered metabolic factors together, and mediators were reported to  
29  
30 254 attenuate the association of a direct effect [5]. One large prospective study conducted in 10  
31  
32 255 regions in China indicated that higher fresh fruit intake is linked to CVD death, and its effect  
33  
34 256 was attenuated by hazard ratios from 0.63 (95% CI: 0.56–0.72) to 0.70 (95% CI: 0.61–0.79)  
35  
36 257 after adjusting for BMI, blood pressure, glucose, and waist circumference [18]. Another study  
37  
38 258 conducted in Shanghai, China showed an attenuated association between fruit intake and  
39  
40 259 incident coronary heart disease after controlling for a history of diabetes, hypertension, or  
41  
42 260 dyslipidemia, but no association or attenuation was observed for vegetable intake [5]. A  
43  
44 261 women's health study reported by Liu et al. also showed that the effect of fruits and  
45  
46 262 vegetables on CVD risk became stronger after excluding subjects with a history of diabetes,  
47  
48 263 hypertension, and high cholesterol [19]. It seems that these mediators largely attribute to the  
49  
50 264 relationship between fruit and/or vegetable intake and CVD risk. However, biological  
51  
52  
53

1  
2  
3  
4 265 pathways by metabolic factors between fruit and/or vegetable intake and CVD risk have not  
5  
6 266 been investigated.

7  
8 267 The assessment of a mediating effect could help understand how fruit and/or vegetable  
9  
10 268 intake affects CVDs. In addition, an effect of poor dietary risk by metabolic mediators on  
11  
12 269 CVD was suggested by the GBD study, so that was considered to estimate the disease burden.  
13  
14 270 The mediating effect of blood pressure on the association between fruit and/or vegetable  
15  
16 271 intake and CVD was suggested by a prospective cohort study of patients in the first National  
17  
18 272 Health and Nutrition Examination Survey [13]. Blood pressure contributed 22.2% to the  
19  
20 273 relationship between fruit and vegetable intake and CVD death. This was similar to the  
21  
22 274 results adjusted for BMI, cholesterol, and blood pressure. That study also showed that the  
23  
24 275 direct effect of fruit and vegetable intake was notable in patients who suffered a stroke but  
25  
26 276 not those with ischemic heart disease. These results are in line with those of the present study.

27  
28  
29 277 We assessed a potential role for BMI on the association between fruit intake and CVD  
30  
31 278 using various models. Several reports, including the above-mentioned study, considered BMI  
32  
33 279 as a potential mediator [13, 18]. Additionally, a causal link between BMI and CVD risk is  
34  
35 280 mediated through metabolic factors. Two pooled studies of prospective cohorts assessed the  
36  
37 281 effect of BMI on coronary heart disease and stroke as mediated by metabolic components.  
38  
39 282 They reported that blood pressure was a more important mediator compared to cholesterol  
40  
41 283 and glucose [17, 20]. Other pooled data from an Asian cohort also indicate that estimated  
42  
43 284 mediating proportions through hypertension were 62.3, 35.7, and 92.4% for the association  
44  
45 285 between BMI and death due to CVD, coronary heart disease, and stroke, respectively, but not  
46  
47 286 by diabetes [21]. The GBD study restricted total calories to 2,000 kcal instead of considering  
48  
49 287 BMI [22]. In the present study, higher fruit intake was inversely associated with BMI, but it  
50  
51  
52  
53  
54  
55  
56  
57  
58  
59  
60

1  
2  
3  
4 288 was borderline significant ( $\beta = -0.06$ ,  $p = 0.08$ ), which affected the results of the fruit intake  
5  
6 289 path  $\rightarrow$  BMI  $\rightarrow$  SBP  $\rightarrow$  CVD in the serial multiple mediator model. Our study found that the  
7  
8 290 mediating effect due to BMI was about 7.9%, but previous studies showed a  $< 3.0\%$   
9  
10 291 mediating effect by BMI on the association between fruit only or fruit and vegetable intake  
11  
12 292 and CVD deaths by presenting little change in the adjusted risk value [13, 18]. However, it is  
13  
14 293 difficult to make a direct comparison due to discrepancies in study design, study populations,  
15  
16 294 the definition of disease, and fruit and/or vegetable intake.

17  
18  
19 295 Eating more vegetables was not significantly associated with either a direct or indirect  
20  
21 296 effect. In Korea, vegetables in the general population are easily accessible by a side dish.  
22  
23 297 Indeed, statistics from the Organisation for Economic Co-operation and Development  
24  
25 298 (OECD) have reported that daily vegetable consumption among adults was the highest in  
26  
27 299 Korea [23]. However, the manner of preparation and/or cooking can influence nutrient  
28  
29 300 content [7]. The favorable effects of fruit and vegetable intake can be explained by nutrients,  
30  
31 301 such as dietary fiber, folate, potassium, and antioxidant vitamins (i.e., vitamin E, vitamin C,  
32  
33 302 polyphenols, flavonoids, and carotenoids) and other components. These nutrients might be  
34  
35 303 involved with controlling glucose, lipid level, and blood pressure, and reduce the risk of CVD  
36  
37 304 along with weight control [7]. However, because foods contain various nutrients, food  
38  
39 305 recommendations help subjects follow a prevention strategy. In addition, healthy eating is  
40  
41 306 also associated with other health behaviors, such as not smoking and regular physical activity  
42  
43 307 [13, 24].

44  
45  
46  
47 308 The present study has some limitations. First, the results were derived from a cross-  
48  
49 309 sectional study design, so causal relationships could not be effectively drawn. Our study  
50  
51 310 design is also open to the problem of reverse causation. If the reverse causation affects the  
52  
53  
54

1  
2  
3  
4 311 results, the association will appear to be null or reverse direction to what is expected. But, the  
5  
6 312 indirect effect by SBP was significant and some parts of our results were consistent with  
7  
8 313 previous studies [13, 24]. Furthermore, the results were consistent even after applying stroke  
9  
10 314 or ischemic heart disease. Because the survey is conducted through a household visit and  
11  
12 315 excludes people in the hospital, subjects with diseases might be the relatively less serious  
13  
14 316 cases. Measurement error in FFQ survey or self-reported disease status may influence the  
15  
16 317 results. In addition, residual confounding factors such as physical activity may have  
17  
18 318 influenced the association. Finally, owing to the number of participants with CVD is very low  
19  
20 319 (1.8%), the study has inadequate statistical power which might explain some of the non-  
21  
22 320 significant findings.

25 321 Nevertheless, our study focused on the mediating effects of metabolic factors on CVD  
26  
27 322 and assessed which metabolic factors affect CVD. Our results were produced using the  
28  
29 323 bootstrapping method and did not impose the assumption of normality of the sampling  
30  
31 324 distribution; thus, it was an appropriate design for multiple mediations [15]. The given  
32  
33 325 evidence was conceptually approached and was not statistically tested for an indirect effect.

36 326 Taken together, our study suggests that controlling SBP might lessen CVD risk, and a  
37  
38 327 diet rich in fruits can be used to regulate SBP, which, in turn, reduces CVD risk.

40 328

42 329

44 330

46 331

48 332

50 333

1  
2  
3  
4 334 **Conflict of interest statement**  
5

6  
7 335 None  
8  
9  
10 336

11  
12  
13 337 **Contributor ship statement**  
14

15 338 HA Lee wrote the manuscript and performed the statistical analyses; D Lim, K Oh, and EJ Kim,  
16  
17 339 provided advice about writing the manuscript, and H Park helped interpret the data.  
18  
19

20 340  
21

22  
23 341 **Funding statement**  
24

25  
26 342 This study was supported by a grant of the Korean Health Technology R&D Project, Ministry of  
27  
28 343 Health & Welfare, Republic of Korea (HI13C0729).  
29  
30

31 344  
32  
33

34 345 **Data availability**  
35

36  
37 346 The National Health and Nutrition Examination Survey files are available from the Korea Centers for Disease  
38  
39 347 Control and Prevention database (URL [https://knhanes.cdc.go.kr/knhanes/sub03/sub03\\_02\\_02.do](https://knhanes.cdc.go.kr/knhanes/sub03/sub03_02_02.do)). If you  
40  
41 348 register your e-mail on this site, you can freely download the raw data.  
42  
43

44 349  
45  
46

47 350  
48  
49

50 351  
51  
52

53 352  
54  
55



353 **REFERENCES**

354

355 1. World Health Organization (2017). Cardiovascular diseases Fact sheet.  
356 <http://www.who.int/mediacentre/factsheets/fs317/en/>. Accessed July 10, 2017.

357 2. Statistics Korea. Causes of Death Statistics in 2015.  
358 <http://kostat.go.kr/portal/eng/pressReleases/8/10/index.board?bmode=read&bSeq=&aSeq=357968&pageNo=1&rowNum=10&navCount=10&currPg=&sTarget=title&sTxt=>. Accessed  
359 July 10, 2017.  
360

361 3. Feigin VL, Roth GA, Naghavi M, Parmar P, Krishnamurthi R, Chugh S, Mensah  
362 GA, Norrving B, Shiue I, Ng M, Estep K, Cercy K, Murray CJL, Forouzanfar MH; Global  
363 Burden of Diseases, Injuries and Risk Factors Study 2013 and Stroke Experts Writing Group.  
364 Global burden of stroke and risk factors in 188 countries, during 1990–2013: a systematic  
365 analysis for the Global Burden of Disease Study 2013. *Lancet Neurol* 2016;15(9):913-924.  
366 doi: 10.1016/S1474-4422(16)30073-4. Epub 2016 Jun 9.

367 4. GBD 2015 Risk Factors Collaborators Global, regional, and national comparative risk  
368 assessment of 79 behavioural, environmental and occupational, and metabolic risks or  
369 clusters of risks, 1990-2015: a systematic analysis for the Global Burden of Disease Study  
370 2015. *Lancet* 2016;388(10053):1659-1724. doi: 10.1016/S0140-6736(16)31679-8.

371 5. Danxia Yu, Xianglan Zhang ,Yu-Tang Gao, Honglan Li, Gong Yang, Jie Huang, Wei  
372 Zheng, Yong-Bing Xiang, and Xiao-Ou Shu. Fruit and Vegetable Intake and Risk of Coronary  
373 Heart Disease: Results from Prospective Cohort Studies of Chinese Adults in Shanghai. *Br J*  
374 *Nutr* 2014; 111(2): 353–362.

375 6. Aune D, Giovannucci E, Boffetta P, Fadnes LT, Keum N, Norat T, Greenwood DC, Riboli  
376 E, Vatten LJ, Tonstad S. Fruit and vegetable intake and the risk of cardiovascular disease,  
377 total cancer and all-cause mortality-a systematic review and dose-response meta-analysis of  
378 prospective studies. *Int J Epidemiol*. 2017;46(3):1029-1056.

379 7. Bazzano LA. Dietary intake of fruit and vegetables and risk of diabetes mellitus and  
380 cardiovascular diseases. Geneva: World Health Organization, 2005.

381 8. Boeing H, Bechthold A, Bub A, Ellinger S, Haller D, Kroke A, Leschik-Bonnet E, Müller  
382 MJ, Oberritter H, Schulze M, Stehle P, Watzl B. Critical review: vegetables and fruit in the

- 1  
2  
3  
4 383 prevention of chronic diseases. *Eur J Nutr*. 2012;51(6):637-63. doi: 10.1007/s00394-012-  
5 384 0380-y.
- 7 385 9. Dauchet L, Amouyel P, Dallongeville J. Fruits, vegetables and coronary heart disease. *Nat*  
8 386 *Rev Cardiol*. 2009;6(9):599-608. doi: 10.1038/nrcardio.2009.131.
- 10 387 10. Kweon S, Kim Y, Jang MJ, Kim Y, Kim K, Choi S, Chun C, Khang YH, Oh K. Data  
11 388 resource profile: the Korea National Health and Nutrition Examination Survey (KNHANES).  
12 389 *Int J Epidemiol* 2014;43(1):69-77. doi: 10.1093/ije/dyt228.
- 15 390 11. Kim DW, Song S, Lee JE, Oh K, Shim J, Kweon S, Paik HY, Joung H. Reproducibility  
16 391 and validity of an FFQ developed for the Korea National Health and Nutrition Examination  
17 392 Survey (KNHANES). *Public Health Nutr* 2015;18(8):1369-1377.
- 20 393 12. Yun SH, Shim JS, Kweon S, Oh, K. Development of a Food Frequency Questionnaire for  
21 394 the Korea National Health and Nutrition Examination Survey: Data from the Fourth Korea  
22 395 National Health and Nutrition Examination Survey (KNHANES IV). *Korean J Nutr* 2013;  
23 396 46(2): 186 ~ 196. (Korean)
- 26 397 13. Bazzano LA, He J, Ogden LG, Loria CM, Vupputuri S, Myers L, Whelton PK. Fruit and  
27 398 vegetable intake and risk of cardiovascular disease in US adults: the first National Health and  
28 399 Nutrition Examination Survey Epidemiologic Follow-up Study. *Am J Clin*  
29 400 *Nutr* 2002;76(1):93-9.
- 33 401 14. Darmon N, Drewnowski A. Does social class predict diet quality? *Am J Clin Nutr*  
34 402 2008;87(5):1107-1117.
- 36 403 15. Preacher KJ, Hayes AF. Asymptotic and resampling strategies for assessing and  
37 404 comparing indirect effects in multiple mediator models. *Behav Res Methods* 2008;40(3):879-  
38 405 91.
- 41 406 16. Andrew F. Hayes. Introduction to mediation, Moderation, and conditional process  
42 407 analysis: a regression-based approach. The Guilford Press, New York, 2013
- 44 408 17. Global Burden of Metabolic Risk Factors for Chronic Diseases Collaboration (BMI  
45 409 Mediated Effects), Lu Y, Hajifathalian K, Ezzati M, Woodward M, Rimm EB, Danaei G.  
46 410 Metabolic mediators of the effects of body-mass index, overweight, and obesity on coronary  
47 411 heart disease and stroke: a pooled analysis of 97 prospective cohorts with 1.8 million  
48 412 participants. *Lancet* 2014;383(9921):970-83. doi: 10.1016/S0140-6736(13)61836-X. Epub  
49 413 2013 Nov 22.

- 1  
2  
3  
4 414 18. Huaidong Du, Liming Li., Derrick Bennett, Yu Guo, Timothy J. Key, Zheng Bian, Paul  
5 415 Sherliker, Haiyan Gao, Yiping Chen, Ling Yang, Junshi Chen, Shanqing Wang, Ranran  
6 416 Du, Hua Su, Rory Collins, Richard Peto, Zhengming Chen, for the China Kadoorie  
7 417 Biobank Study. Fresh Fruit Consumption and Major Cardiovascular Disease in China. *N*  
8 418 *Engl J Med* 2016; 374(14): 1332–1343.
- 9  
10  
11  
12 419 19. Liu S, Manson JE, Lee IM, Cole SR, Hennekens CH, Willett WC, Buring JE. Fruit and  
13 420 vegetable intake and risk of cardiovascular disease: the Women's Health Study. *Am J Clin*  
14 421 *Nutr* 2000;72(4):922-8.
- 15  
16  
17 422 20. Lu Y, Hajifathalian K, Rimm EB, Ezzati M, Danaei G. Mediators of the Effect of Body  
18 423 Mass Index on Coronary Heart Disease: Decomposing Direct and Indirect Effects.  
19 424 *Epidemiology* 2015 ;26(2):153-62. doi: 10.1097/EDE.0000000000000234.
- 20  
21  
22 425 21. Chen Y, Copeland WK, Vedanthan R, Grant E, Lee JE, Gu D, Gupta PC, Ramadas  
23 426 K, Inoue M, Tsugane S, Tamakoshi A, Gao YT, Yuan JM, Shu XO, Ozasa K, Tsuji I, Kakizaki  
24 427 M, Tanaka H, Nishino Y, Chen CJ, Wang R, Yoo KY, Ahn YO, Ahsan H, Pan WH, Chen  
25 428 CS, Pednekar MS, Sauvaget C, Sasazuki S, Yang G, Koh WP, Xiang YB, Ohishi W, Watanabe  
26 429 T, Sugawara Y, Matsuo K, You SL, Park SK, Kim DH, Parvez F, Chuang SY, Ge W, Rolland  
27 430 B, McLerran D, Sinha R, Thornquist M, Kang D, Feng Z, Boffetta P, Zheng W, He J, Potter  
28 431 JD. Association between body mass index and cardiovascular disease mortality in east Asians  
29 432 and south Asians: pooled analysis of prospective data from the Asia Cohort Consortium.  
30 433 *BMJ* 2013;347:f5446. doi: 10.1136/bmj.f5446.
- 31  
32  
33 434 22. GBD 2013 Risk Factors Collaborators, Forouzanfar MH, Alexander L, Anderson  
34 435 HR, Bachman VF, Biryukov S, Brauer M, Burnett R, Casey D, Coates MM, et al. Global,  
35 436 regional, and national comparative risk assessment of 79 behavioural, environmental and  
36 437 occupational, and metabolic risks or clusters of risks in 188 countries, 1990–2013: a  
37 438 systematic analysis for the Global Burden of Disease Study 2013. *Lancet*  
38 439 2015;386(10010):2287-323. doi: 10.1016/S0140-6736(15)00128-2.
- 39  
40  
41 440 23. Organisation for Economic Co-operation and Development. Daily vegetable eating  
42 441 among adults, 2013 (or nearest year), in Health at a Glance 2015, OECD Publishing, Paris,  
43 442 2015. doi: [http://dx.doi.org/10.1787/health\\_glance-2015-graph42-en](http://dx.doi.org/10.1787/health_glance-2015-graph42-en).
- 44  
45  
46 443 24. Takachi R, Inoue M, Ishihara J, Kurahashi N, Iwasaki M, Sasazuki S, Iso H, Tsubono  
47 444 Y, Tsugane S; JPHC Study Group. Fruit and vegetable intake and risk of total cancer and

1  
2  
3  
4 445 cardiovascular disease: Japan Public Health Center-Based Prospective Study. *Am J*  
5 446 *Epidemiol* 2008;167(1):59-70.  
6  
7 447  
8  
9

10 448

11  
12 449

13  
14  
15 450

16  
17 451

18  
19  
20 452

21  
22 453

23  
24 454

25  
26  
27 455

28  
29 456

30  
31 457

32  
33 458

34  
35  
36 459

37  
38 460

39  
40 461

41  
42 462

43  
44  
45 463

46  
47 464

48  
49  
50 465

51  
52 466

1  
2  
3  
4 467 **Figure Legends**

5  
6  
7 468

8  
9  
10 469 Figure 1. The effect of multiple metabolic factor ( $M_i$ ) mediators in the association between  
11  
12 470 fruit intake (X) and cardiovascular diseases (Y).

13  
14  
15 471 <sup>a</sup> $p < 0.01$ , <sup>b</sup> $p < 0.001$ , SBP: systolic blood pressure. Coefficients were adjusted for sex, age,  
16  
17 472 income, region (urban/rural), current smoker, and survey year using the bootstrapping method.

18  
19 473

20  
21  
22 474 Figure 2. The effect of multiple serial mediators of metabolic factors ( $M_i$ ) in the association  
23  
24 475 between fruit intake (X) and cardiovascular diseases (Y).

25  
26  
27 476 <sup>a</sup> $p < 0.1$ , <sup>b</sup> $p < 0.05$ , <sup>c</sup> $p < 0.01$ , <sup>d</sup> $p < 0.001$ , BMI: body mass index, SBP: systolic blood pressure.  
28  
29 477 Coefficients were adjusted for sex, age, income, region (urban/rural), current smoker, and  
30  
31 478 survey year using the bootstrapping method.

32  
33 479

34  
35 480

36  
37 481

38  
39 482

40  
41 483

42  
43 484

44  
45 485

486 Table 1. Basic characteristics of the study subjects.

|                                      | Weighted % (SE) |
|--------------------------------------|-----------------|
| <b>Sex</b>                           |                 |
| Male                                 | 49.92 (0.51)    |
| Female                               | 50.08 (0.51)    |
| <b>Age range</b>                     |                 |
| Age (years)†                         | 25–64 years     |
|                                      | 43.68 (0.18)    |
| <b>Region</b>                        |                 |
| Urban                                | 83.87 (1.52)    |
| Rural                                | 16.13 (1.52)    |
| <b>Income level (quartiles)</b>      |                 |
| Q1                                   | 23.46 (0.73)    |
| Q2                                   | 25.61 (0.72)    |
| Q3                                   | 25.03 (0.71)    |
| Q4                                   | 25.90 (0.97)    |
| <b>Current smoking</b>               |                 |
| No                                   | 75.83 (0.60)    |
| Yes                                  | 24.17 (0.60)    |
| <b>Disease</b>                       |                 |
| Cardiovascular disease               | 1.81 (0.16)     |
| Stroke                               | 0.98 (0.13)     |
| Ischemic heart disease               | 0.90 (0.10)     |
| <b>Metabolic Factors†</b>            |                 |
| Systolic blood pressure (mmHg)       | 115.01 (0.21)   |
| Total cholesterol (mg/dL)            | 190.98 (0.47)   |
| Fasting plasma glucose (mg/dL)       | 98.58 (0.30)    |
| Body mass index (kg/m <sup>2</sup> ) | 23.92 (0.05)    |

487

488 SE: Standard error.

489 †Weighted mean with standard error.

490

491

492

493

494

495

496

497

498 Table 2. The effect of metabolic mediators (M) in the association between fruit intake (X) and  
 499 cardiovascular disease (Y).

| Metabolic<br>Factors (M) | Fruit intake |       |          |           |       |          |                               |       |          |                       |                |
|--------------------------|--------------|-------|----------|-----------|-------|----------|-------------------------------|-------|----------|-----------------------|----------------|
|                          | X → M (a)    |       |          | M → Y (b) |       |          | X → Y<br>(c' = direct effect) |       |          | Indirect effect (a*b) |                |
|                          | $\beta$      | SE    | <i>p</i> | $\beta$   | SE    | <i>p</i> | $\beta$                       | SE    | <i>p</i> | $\beta$               | 95% CI         |
| SBP <sup>a</sup>         | -0.484       | 0.144 | 0.001    | 0.013     | 0.004 | 0.002    | -0.137                        | 0.072 | 0.06     | -0.007                | -0.014 -0.002  |
| TC <sup>a</sup>          | -0.156       | 0.357 | 0.66     | -0.019    | 0.003 | <.0001   | -0.144                        | 0.075 | 0.05     | 0.003                 | -0.011 0.017   |
| FPG <sup>a</sup>         | -0.665       | 0.217 | <.01     | 0.004     | 0.003 | 0.20     | -0.144                        | 0.074 | 0.05     | -0.002                | -0.006 0.001   |
| BMI <sup>a</sup>         | -0.059       | 0.034 | 0.08     | 0.078     | 0.022 | 0.001    | -0.143                        | 0.072 | <.05     | -0.005                | -0.012 0.001   |
| SBP <sup>b</sup>         | -0.420       | 0.139 | <.01     | 0.011     | 0.005 | 0.01     | -0.127                        | 0.072 | 0.08     | -0.005                | -0.011 -0.0004 |
| TC <sup>b</sup>          | -0.064       | 0.352 | 0.86     | -0.019    | 0.003 | <.0001   | -0.126                        | 0.075 | 0.09     | 0.001                 | -0.012 0.015   |
| FPG <sup>b</sup>         | -0.614       | 0.214 | <.01     | 0.002     | 0.003 | 0.42     | -0.130                        | 0.074 | 0.08     | -0.002                | -0.005 0.002   |

500

501 SBP: systolic blood pressure, TC: total cholesterol, FPG: fasting plasma glucose, BMI: body mass  
 502 index, SE: standard error, 95% CI: 95% confidence interval.

503 <sup>a</sup>Adjusted for sex, age, income, region (urban/rural), current smoking, and survey year.

504 <sup>b</sup>Adjusted for sex, age, income, region (urban/rural), current smoking, survey year, and body mass  
 505 index.

506

507

508

509

510

511

512

513

514

515

516

517

518

519

520 Table 3. The effect of metabolic mediators (M) in the association between vegetable intake  
521 (X) and cardiovascular disease (Y).

| Metabolic Factors (M) | Vegetable intake |       |          |           |       |          |                            |       |          |                       |              |
|-----------------------|------------------|-------|----------|-----------|-------|----------|----------------------------|-------|----------|-----------------------|--------------|
|                       | X → M (a)        |       |          | M → Y (b) |       |          | X → Y (c' = direct effect) |       |          | Indirect effect (a*b) |              |
|                       | $\beta$          | SE    | <i>p</i> | $\beta$   | SE    | <i>p</i> | $\beta$                    | SE    | <i>p</i> | $\beta$               | 95% CI       |
| SBP <sup>a</sup>      | -0.042           | 0.169 | 0.80     | 0.014     | 0.004 | 0.002    | -0.132                     | 0.086 | 0.13     | -0.001                | -0.006 0.004 |
| TC <sup>a</sup>       | 0.236            | 0.420 | 0.57     | -0.019    | 0.003 | <.0001   | -0.121                     | 0.089 | 0.18     | -0.005                | -0.021 0.012 |
| FPG <sup>a</sup>      | -0.054           | 0.256 | 0.83     | 0.004     | 0.003 | 0.18     | -0.132                     | 0.088 | 0.14     | -0.0002               | -0.003 0.002 |
| BMI <sup>a</sup>      | 0.057            | 0.040 | 0.16     | 0.080     | 0.022 | <.001    | -0.145                     | 0.086 | 0.09     | 0.005                 | -0.002 0.013 |
| SBP <sup>b</sup>      | -0.114           | 0.163 | 0.48     | 0.012     | 0.005 | 0.01     | -0.131                     | 0.086 | 0.13     | -0.001                | -0.006 0.002 |
| TC <sup>b</sup>       | 0.142            | 0.415 | 0.73     | -0.019    | 0.003 | <.0001   | -0.122                     | 0.089 | 0.17     | -0.003                | -0.019 0.014 |
| FPG <sup>b</sup>      | -0.121           | 0.252 | 0.63     | 0.003     | 0.003 | 0.4      | -0.132                     | 0.088 | 0.14     | -0.0003               | -0.003 0.002 |

522 SBP: systolic blood pressure, TC: total cholesterol, FPG: fasting plasma glucose, BMI: body mass  
523 index, SE: standard error, 95% CI: 95% confidence interval.

524 <sup>a</sup>Adjusted for sex, age, income, region (urban/rural), current smoking, and survey year.

525 <sup>b</sup>Adjusted for sex, age, income, region (urban/rural), current smoking, survey year, and body mass  
526 index.

527

528

529

530

531

532

533

534

535

536

537

538

539

540



Figure 1

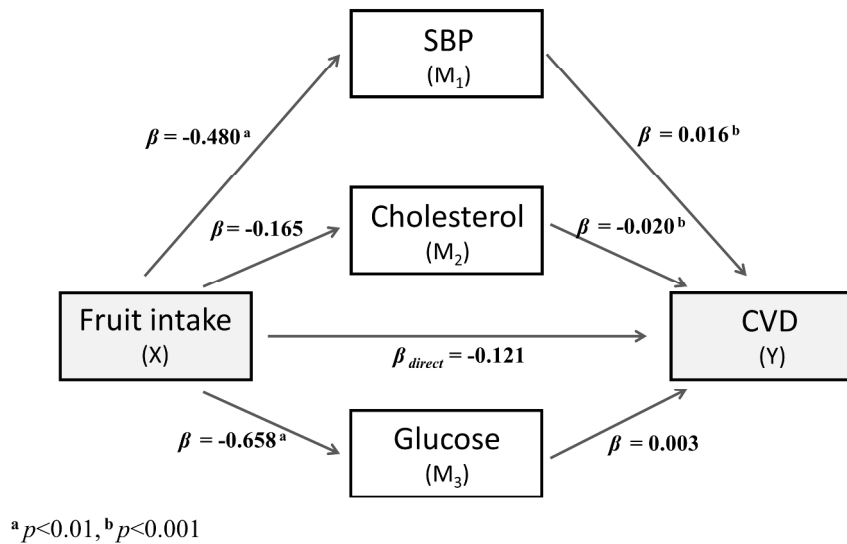

figure1

254x190mm (300 x 300 DPI)

Figure 2

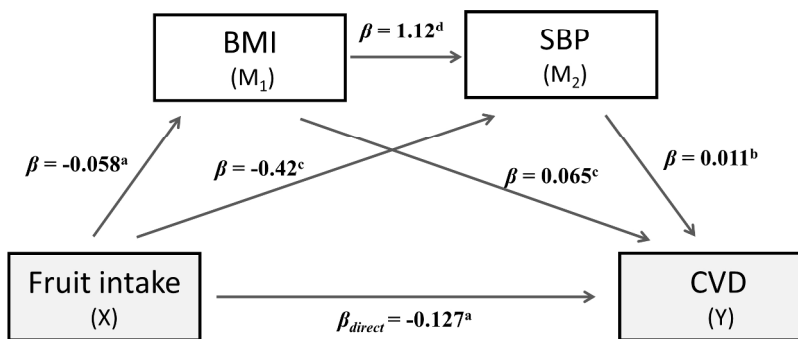

<sup>a</sup>  $p < 0.1$ , <sup>b</sup>  $p < 0.05$ , <sup>c</sup>  $p < 0.01$ , <sup>d</sup>  $p < 0.001$

figure2

254x190mm (300 x 300 DPI)

Supplemental Table 1. List of fruit or vegetable related food items

| Fruit                      | Vegetable                                                           |
|----------------------------|---------------------------------------------------------------------|
| Strawberry                 | Bean sprouts (seasoned, soup)                                       |
| Melon                      | Seasoned mung bean sprout                                           |
| Watermelon                 | Seasoned spinach                                                    |
| Peach                      | Seasoned bellflower (boiled or not)                                 |
| Grape                      | Pumpkin (seasoned, pan-fried)                                       |
| Apple                      | Other seasoned vegetables                                           |
| Pear                       | Cucumber (seasoned, raw)                                            |
| Persimmon, dried persimmon | Radish (seasoned, pickled, dried)                                   |
| Tangerine                  | Vegetable salad                                                     |
| Banana                     | Seasoned green onion, and seasoned Chinese chives                   |
| Orange                     | Raw vegetables (lettuce, sesame, Chinese cabbage, and pumpkin leaf) |
| Kiwi                       | Green pepper                                                        |
|                            | Boiled broccoli, boiled cabbage                                     |
|                            | Garlic                                                              |
|                            | Tomato, and cherry tomato                                           |

The food frequency questionnaire consists of dietary consumption using a 9-point scale (less than once per month or never, once per month, 2–3 times per month, once per week, 2–4 times per week, 5–6 times per week, once per day, twice per day, and three times per day) and three levels to represent the amount consumed by referring to a standard amount (less, standard, and more).

Supplemental Table 2. Distribution of basic characteristics by fruit intake.

|                                 | Fruit intake |       |            |       |             |       |              |       | <i>p</i> <sub>trend</sub> |
|---------------------------------|--------------|-------|------------|-------|-------------|-------|--------------|-------|---------------------------|
|                                 | < 1 time/day |       | 1 time/day |       | 2 times/day |       | 3+ times/day |       |                           |
|                                 | n            | %     | n          | %     | n           | %     | n            | %     |                           |
| <b>Survey year</b>              |              |       |            |       |             |       |              |       |                           |
| 2013                            | 961          | 29.61 | 935        | 28.8  | 629         | 19.38 | 721          | 22.21 | 0.03                      |
| 2014                            | 945          | 31.81 | 825        | 27.77 | 538         | 18.11 | 663          | 22.32 |                           |
| 2015                            | 916          | 32.45 | 810        | 28.69 | 488         | 17.29 | 609          | 21.57 |                           |
| <b>Sex</b>                      |              |       |            |       |             |       |              |       |                           |
| Male                            | 1519         | 42.73 | 983        | 27.65 | 551         | 15.5  | 502          | 14.12 | <.0001                    |
| Female                          | 1303         | 23.76 | 1587       | 28.93 | 1104        | 20.13 | 1491         | 27.18 |                           |
| <b>Age (years)</b>              | 45.83        | 10.97 | 45.38      | 10.94 | 45.76       | 10.69 | 46.53        | 10.81 | 0.02                      |
| <b>Region</b>                   |              |       |            |       |             |       |              |       |                           |
| Urban                           | 2280         | 30.62 | 2118       | 28.44 | 1389        | 18.65 | 1660         | 22.29 | <.01                      |
| Rural                           | 542          | 34.02 | 452        | 28.37 | 266         | 16.7  | 333          | 20.9  |                           |
| <b>Income level (quartiles)</b> |              |       |            |       |             |       |              |       |                           |
| Q1                              | 863          | 40.29 | 574        | 26.8  | 354         | 16.53 | 351          | 16.39 | <.0001                    |
| Q2                              | 827          | 36.38 | 634        | 27.89 | 359         | 15.79 | 453          | 19.93 |                           |
| Q3                              | 612          | 26.9  | 702        | 30.86 | 435         | 19.12 | 526          | 23.12 |                           |
| Q4                              | 510          | 22.02 | 649        | 28.02 | 500         | 21.59 | 657          | 28.37 |                           |
| <b>Current smoking</b>          |              |       |            |       |             |       |              |       |                           |
| No                              | 1826         | 26.21 | 2030       | 29.14 | 1377        | 19.77 | 1733         | 24.88 | <.0001                    |
| Yes                             | 833          | 50.24 | 431        | 26    | 210         | 12.67 | 184          | 11.1  |                           |

Supplemental Table 3. Distribution of basic characteristics by vegetable intake.

|                                 | Vegetable intake |       |            |       |             |       |              |       | <i>p</i> <sub>trend</sub> |
|---------------------------------|------------------|-------|------------|-------|-------------|-------|--------------|-------|---------------------------|
|                                 | < 1 time/day     |       | 1 time/day |       | 2 times/day |       | 3+ times/day |       |                           |
|                                 | n                | %     | n          | %     | n           | %     | n            | %     |                           |
| <b>Survey year</b>              |                  |       |            |       |             |       |              |       |                           |
| 2013                            | 357              | 11    | 711        | 21.9  | 674         | 20.76 | 1504         | 46.33 | <.0001                    |
| 2014                            | 374              | 12.59 | 725        | 24.4  | 585         | 19.69 | 1287         | 43.32 |                           |
| 2015                            | 382              | 13.53 | 724        | 25.65 | 574         | 20.33 | 1143         | 40.49 |                           |
| <b>Sex</b>                      |                  |       |            |       |             |       |              |       |                           |
| Male                            | 428              | 12.04 | 892        | 25.09 | 709         | 19.94 | 1526         | 42.93 | 0.38                      |
| Female                          | 685              | 12.49 | 1268       | 23.12 | 1124        | 20.49 | 2408         | 43.9  |                           |
| <b>Age (years)</b>              | 45.54            | 11.70 | 45.11      | 10.93 | 45.49       | 10.93 | 46.49        | 10.55 | <.0001                    |
| <b>Region</b>                   |                  |       |            |       |             |       |              |       |                           |
| Urban                           | 910              | 12.22 | 1775       | 23.84 | 1526        | 20.49 | 3236         | 43.45 | 0.73                      |
| Rural                           | 203              | 12.74 | 385        | 24.17 | 307         | 19.27 | 698          | 43.82 |                           |
| <b>Income level (quartiles)</b> |                  |       |            |       |             |       |              |       |                           |
| Q1                              | 394              | 18.39 | 550        | 25.68 | 391         | 18.25 | 807          | 37.68 | <.0001                    |
| Q2                              | 288              | 12.67 | 587        | 25.82 | 481         | 21.16 | 917          | 40.34 |                           |
| Q3                              | 239              | 10.51 | 529        | 23.25 | 485         | 21.32 | 1022         | 44.92 |                           |
| Q4                              | 187              | 8.07  | 486        | 20.98 | 468         | 20.21 | 1175         | 50.73 |                           |
| <b>Current smoker</b>           |                  |       |            |       |             |       |              |       |                           |
| No                              | 810              | 11.63 | 1668       | 23.94 | 1421        | 20.4  | 3067         | 44.03 | <.01                      |
| Yes                             | 248              | 14.96 | 392        | 23.64 | 325         | 19.6  | 693          | 41.8  |                           |

Supplemental Table 4. The effect of metabolic mediators (M) in the association between fruit intake (X) and stroke (Y).

| Metabolic Factors (M) | Fruit intake |       |          |           |       |          |                            |       |          |                       |        |        |
|-----------------------|--------------|-------|----------|-----------|-------|----------|----------------------------|-------|----------|-----------------------|--------|--------|
|                       | X → M (a)    |       |          | M → Y (b) |       |          | X → Y (c' = direct effect) |       |          | Indirect effect (a*b) |        |        |
|                       | $\beta$      | SE    | <i>p</i> | $\beta$   | SE    | <i>p</i> | $\beta$                    | SE    | <i>p</i> | $\beta$               | 95% CI |        |
| SBP <sup>a</sup>      | -0.484       | 0.144 | <.001    | 0.015     | 0.006 | <.01     | -0.242                     | 0.100 | 0.02     | -0.007                | -0.017 | -0.001 |
| TC <sup>a</sup>       | -0.156       | 0.357 | 0.66     | -0.018    | 0.003 | <.0001   | -0.268                     | 0.105 | 0.01     | 0.003                 | -0.009 | 0.016  |
| FPG <sup>a</sup>      | -0.665       | 0.217 | <.01     | 0.005     | 0.004 | 0.19     | -0.269                     | 0.105 | 0.01     | -0.003                | -0.008 | 0.002  |
| BMI <sup>a</sup>      | -0.059       | 0.034 | 0.08     | 0.074     | 0.029 | 0.01     | -0.249                     | 0.100 | 0.01     | -0.004                | -0.013 | 0.001  |
| SBP <sup>b</sup>      | -0.420       | 0.139 | <.01     | 0.013     | 0.006 | 0.03     | -0.238                     | 0.100 | 0.02     | -0.005                | -0.014 | 0.001  |
| TC <sup>b</sup>       | -0.064       | 0.352 | 0.86     | -0.018    | 0.003 | <.0001   | -0.255                     | 0.105 | 0.02     | 0.001                 | -0.011 | 0.015  |
| FPG <sup>b</sup>      | -0.614       | 0.214 | <.01     | 0.003     | 0.004 | 0.37     | -0.260                     | 0.105 | 0.01     | -0.002                | -0.007 | 0.004  |

SBP: systolic blood pressure, TC: total cholesterol, FPG: fasting plasma glucose, BMI: body mass index, SE: standard error, 95% CI: 95% confidence interval.

<sup>a</sup>Adjusted for sex, age, income, region (urban/rural), current smoking, and survey year.

<sup>b</sup>Adjusted for sex, age, income, region (urban/rural), current smoking, survey year, and body mass index.

Supplemental Table 5. The effect of metabolic mediators (M) in the association between fruit intake (X) and ischemic heart disease (Y).

| Metabolic Factors (M) | Fruit intake |       |          |           |       |          |                            |       |          |                       |        |         |
|-----------------------|--------------|-------|----------|-----------|-------|----------|----------------------------|-------|----------|-----------------------|--------|---------|
|                       | X → M (a)    |       |          | M → Y (b) |       |          | X → Y (c' = direct effect) |       |          | Indirect effect (a*b) |        |         |
|                       | $\beta$      | SE    | <i>p</i> | $\beta$   | SE    | <i>p</i> | $\beta$                    | SE    | <i>p</i> | $\beta$               | 95% CI |         |
| SBP <sup>a</sup>      | -0.484       | 0.144 | <.001    | 0.011     | 0.006 | 0.06     | -0.065                     | 0.097 | 0.51     | -0.006                | -0.013 | -0.0001 |
| TC <sup>a</sup>       | -0.156       | 0.357 | 0.66     | -0.021    | 0.003 | <.0001   | -0.042                     | 0.100 | 0.67     | 0.003                 | -0.012 | 0.019   |
| FPG <sup>a</sup>      | -0.665       | 0.217 | <.01     | 0.002     | 0.004 | 0.65     | -0.048                     | 0.099 | 0.63     | -0.001                | -0.006 | 0.004   |
| BMI <sup>a</sup>      | -0.059       | 0.034 | 0.08     | 0.079     | 0.031 | 0.01     | -0.069                     | 0.097 | 0.48     | -0.005                | -0.012 | 0.001   |
| SBP <sup>b</sup>      | -0.420       | 0.139 | <.01     | 0.010     | 0.006 | 0.12     | -0.047                     | 0.097 | 0.63     | -0.004                | -0.011 | 0.001   |
| TC <sup>b</sup>       | -0.064       | 0.352 | 0.86     | -0.020    | 0.003 | <.0001   | -0.018                     | 0.100 | 0.86     | 0.001                 | -0.013 | 0.016   |
| FPG <sup>b</sup>      | -0.614       | 0.214 | <.01     | 0.001     | 0.004 | 0.88     | -0.028                     | 0.099 | 0.78     | 0.000                 | -0.004 | 0.005   |

SBP: systolic blood pressure, TC: total cholesterol, FPG: fasting plasma glucose, BMI: body mass index, SE: standard error, 95% CI: 95% confidence interval.

<sup>a</sup>Adjusted for sex, age, income, region (urban/rural), current smoking, and survey year.

<sup>b</sup>Adjusted for sex, age, income, region (urban/rural), current smoking, survey year, and body mass index.

**STROBE 2007 (v4) Statement—Checklist of items that should be included in reports of *cross-sectional studies***

| Section/Topic                | Item # | Recommendation                                                                                                                                                                       | Reported on page # |
|------------------------------|--------|--------------------------------------------------------------------------------------------------------------------------------------------------------------------------------------|--------------------|
| Title and abstract           | 1      | (a) Indicate the study's design with a commonly used term in the title or the abstract                                                                                               | 2                  |
|                              |        | (b) Provide in the abstract an informative and balanced summary of what was done and what was found                                                                                  | 2                  |
| <b>Introduction</b>          |        |                                                                                                                                                                                      |                    |
| Background/rationale         | 2      | Explain the scientific background and rationale for the investigation being reported                                                                                                 | 4                  |
| Objectives                   | 3      | State specific objectives, including any prespecified hypotheses                                                                                                                     | 5                  |
| <b>Methods</b>               |        |                                                                                                                                                                                      |                    |
| Study design                 | 4      | Present key elements of study design early in the paper                                                                                                                              | 6                  |
| Setting                      | 5      | Describe the setting, locations, and relevant dates, including periods of recruitment, exposure, follow-up, and data collection                                                      | 6                  |
| Participants                 | 6      | (a) Give the eligibility criteria, and the sources and methods of selection of participants                                                                                          | 6                  |
| Variables                    | 7      | Clearly define all outcomes, exposures, predictors, potential confounders, and effect modifiers. Give diagnostic criteria, if applicable                                             | 6-8                |
| Data sources/<br>measurement | 8*     | For each variable of interest, give sources of data and details of methods of assessment (measurement). Describe comparability of assessment methods if there is more than one group | 6-8                |
| Bias                         | 9      | Describe any efforts to address potential sources of bias                                                                                                                            | 15                 |
| Study size                   | 10     | Explain how the study size was arrived at                                                                                                                                            | 6                  |
| Quantitative variables       | 11     | Explain how quantitative variables were handled in the analyses. If applicable, describe which groupings were chosen and why                                                         | 6-8                |
| Statistical methods          | 12     | (a) Describe all statistical methods, including those used to control for confounding                                                                                                | 8-9                |
|                              |        | (b) Describe any methods used to examine subgroups and interactions                                                                                                                  |                    |
|                              |        | (c) Explain how missing data were addressed                                                                                                                                          |                    |
|                              |        | (d) If applicable, describe analytical methods taking account of sampling strategy                                                                                                   |                    |
|                              |        | (e) Describe any sensitivity analyses                                                                                                                                                | 8                  |
| <b>Results</b>               |        |                                                                                                                                                                                      |                    |



|                          |     |                                                                                                                                                                                                                                                                                                                                                                                                               |            |
|--------------------------|-----|---------------------------------------------------------------------------------------------------------------------------------------------------------------------------------------------------------------------------------------------------------------------------------------------------------------------------------------------------------------------------------------------------------------|------------|
| Participants             | 13* | (a) Report numbers of individuals at each stage of study—eg numbers potentially eligible, examined for eligibility, confirmed eligible, included in the study, completing follow-up, and analysed<br>(b) Give reasons for non-participation at each stage<br>(c) Consider use of a flow diagram                                                                                                               | 6          |
| Descriptive data         | 14* | (a) Give characteristics of study participants (eg demographic, clinical, social) and information on exposures and potential confounders<br>(b) Indicate number of participants with missing data for each variable of interest                                                                                                                                                                               | 10         |
| Outcome data             | 15* | Report numbers of outcome events or summary measures                                                                                                                                                                                                                                                                                                                                                          | 10         |
| Main results             | 16  | (a) Give unadjusted estimates and, if applicable, confounder-adjusted estimates and their precision (eg, 95% confidence interval). Make clear which confounders were adjusted for and why they were included<br>(b) Report category boundaries when continuous variables were categorized<br>(c) If relevant, consider translating estimates of relative risk into absolute risk for a meaningful time period | 10-11<br>7 |
| Other analyses           | 17  | Report other analyses done—eg analyses of subgroups and interactions, and sensitivity analyses                                                                                                                                                                                                                                                                                                                | 11         |
| <b>Discussion</b>        |     |                                                                                                                                                                                                                                                                                                                                                                                                               |            |
| Key results              | 18  | Summarise key results with reference to study objectives                                                                                                                                                                                                                                                                                                                                                      | 12         |
| Limitations              | 19  | Discuss limitations of the study, taking into account sources of potential bias or imprecision. Discuss both direction and magnitude of any potential bias                                                                                                                                                                                                                                                    | 15         |
| Interpretation           | 20  | Give a cautious overall interpretation of results considering objectives, limitations, multiplicity of analyses, results from similar studies, and other relevant evidence                                                                                                                                                                                                                                    | 12-15      |
| Generalisability         | 21  | Discuss the generalisability (external validity) of the study results                                                                                                                                                                                                                                                                                                                                         | 15         |
| <b>Other information</b> |     |                                                                                                                                                                                                                                                                                                                                                                                                               |            |
| Funding                  | 22  | Give the source of funding and the role of the funders for the present study and, if applicable, for the original study on which the present article is based                                                                                                                                                                                                                                                 | 16         |

\*Give information separately for cases and controls in case-control studies and, if applicable, for exposed and unexposed groups in cohort and cross-sectional studies.

**Note:** An Explanation and Elaboration article discusses each checklist item and gives methodological background and published examples of transparent reporting. The STROBE checklist is best used in conjunction with this article (freely available on the Web sites of PLoS Medicine at <http://www.plosmedicine.org/>, Annals of Internal Medicine at <http://www.annals.org/>, and Epidemiology at <http://www.epidem.com/>). Information on the STROBE Initiative is available at [www.strobe-statement.org](http://www.strobe-statement.org).

# BMJ Open

## The mediating effects of metabolic factors on the association between fruit or vegetable intake and cardiovascular disease: the Korean National Health and Nutrition Examination Survey

|                                 |                                                                                                                                                                                                                                                                                                                                                                                                                            |
|---------------------------------|----------------------------------------------------------------------------------------------------------------------------------------------------------------------------------------------------------------------------------------------------------------------------------------------------------------------------------------------------------------------------------------------------------------------------|
| Journal:                        | <i>BMJ Open</i>                                                                                                                                                                                                                                                                                                                                                                                                            |
| Manuscript ID                   | bmjopen-2017-019620.R2                                                                                                                                                                                                                                                                                                                                                                                                     |
| Article Type:                   | Research                                                                                                                                                                                                                                                                                                                                                                                                                   |
| Date Submitted by the Author:   | 22-Jan-2018                                                                                                                                                                                                                                                                                                                                                                                                                |
| Complete List of Authors:       | Lee, Hye Ah; Mokdong Hospital, Ewha Womans University, Clinical Trial Center<br>Lim, Dohee; Korea Centers for Disease Control and Prevention<br>Oh, Kyungwon ; Korea Centers for Disease Control and Prevention, Division of Health and Nutrition Survey<br>Kim, Eun Jung ; Pyeongtaek University, Department of Nursing<br>Park, Hyesook; College of Medicine, Ewha Womans University, Department of preventive medicine, |
| <b>Primary Subject Heading</b>: | Public health                                                                                                                                                                                                                                                                                                                                                                                                              |
| Secondary Subject Heading:      | Epidemiology                                                                                                                                                                                                                                                                                                                                                                                                               |
| Keywords:                       | Cardiovascular disease, blood pressure, NUTRITION & DIETETICS                                                                                                                                                                                                                                                                                                                                                              |
|                                 |                                                                                                                                                                                                                                                                                                                                                                                                                            |

SCHOLARONE™  
Manuscripts

1  
2  
3  
4 1 **The mediating effects of metabolic factors on the association between fruit or vegetable**  
5  
6 2 **intake and cardiovascular disease: the Korean National Health and Nutrition**  
7  
8 3 **Examination Survey**  
9  
10  
11 4

14 5 Hye Ah Lee<sup>1</sup>, Dohee Lim<sup>2</sup>, Kyungwon Oh<sup>2</sup>, Eun Jung Kim<sup>3</sup>,

16 6 Hyesook Park<sup>4</sup>

18 7 <sup>1</sup>Clinical Trial Center, Mokdong Hospital, Ewha Womans University, Seoul, <sup>2</sup>Division of  
19 8 Health and Nutrition Survey, Korea Centers for Disease Control and Prevention, Cheongwon-  
20 9 gun, <sup>3</sup>Department of Nursing, Pyeongtaek University, Pyeongtaek, <sup>4</sup>Department of preventive  
21 10 medicine, College of Medicine, Ewha Womans University, Seoul, Korea  
22  
23  
24  
25  
26  
27  
28  
29  
30  
31  
32  
33  
34

35 14 **Address for corresponding author:** Hyesook Park, MD, Ph.D.

38 15 Department of Preventive Medicine, School of Medicine, Ewha Womans University, 1071,  
39 16 Anyangcheon-ro, Yangcheon-ku, Seoul 158-710, Republic of Korea  
40  
41  
42

43 17 Tel : +82.2-2650-5756, Fax: +82.2-2652-8325  
44  
45

46 18 E-mail : [hpark@ewha.ac.kr](mailto:hpark@ewha.ac.kr)  
47  
48  
49  
50  
51

52 20 **Word count:** 2,986  
53  
54

1  
2  
3  
4 21 **Abstract**

5  
6  
7 22 **Objective:** We assessed the mediating effects of metabolic components on the relationship  
8  
9 23 between fruit or vegetable intake and cardiovascular disease (CVD).

10  
11  
12 24 **Design:** Cross-sectional study

13  
14  
15 25 **Setting:** This study was conducted using data from the 2013–2015 Korean National Health  
16  
17 26 and Nutrition Examination Survey, which is a national representative cross-sectional survey  
18  
19 27 to assess health and nutritional status in the Korean population.

20  
21  
22 28 **Method and analysis:** A total of 9,040 subjects (3,555 males and 5,485 females) aged  $\geq 25$   
23  
24 29 years were included in the study. Physician-diagnosed CVD via self-report was used as the  
25  
26 30 outcome. Fruit or vegetable intake was measured via a dish-based semi-quantitative food  
27  
28 31 frequency questionnaire and grouped into categories ( $< 1$  time/d, 1 time/d, 2 times/d, and  $\geq 3$   
29  
30 32 times/d). Systolic blood pressure (SBP), cholesterol, and fasting glucose were considered  
31  
32 33 metabolic mediators, and the bootstrap method was used to assess mediating effect.

33  
34  
35  
36 34 **Results:** About 1.8% of adults aged 25–64years had CVD. According to the result of  
37  
38 35 "process" macro, the confounder adjusted risk for CVD decreased by 14% (odds ratio (OR) =  
39  
40 36 0.86, 95 % confidence interval (CI): 0.74–0.98) as fruit, but not vegetable, intake was  
41  
42 37 increased by one unit per day. After additional adjustment for three metabolic factors  
43  
44 38 simultaneously, the OR was attenuated to 0.89 (95% CI; 0.77–1.03). This result indicates that  
45  
46 39 the indirect effect of three metabolic factors accounted for 21.4% of the relationship between  
47  
48 40 fruit intake and CVD. SBP was a more important metabolic mediator than the other factors.  
49  
50 41 The indirect effect by metabolic factors accounted for 30.0% when body mass index was

1  
2  
3  
4 42 additionally controlled as a mediator, and SBP still had an independent effect compared to the  
5  
6 43 other mediators.  
7

8  
9 44 **Conclusions:** Our results indicate that controlling SBP may lessen the CVD risk, and a diet  
10  
11 45 rich in fruits can regulate SBP, which, in turn, reduces CVD risk.  
12

13  
14 46 **Keywords:** Cardiovascular disease, blood pressure, diet  
15

16  
17 47  
18

19  
20 48 **ARTICLE SUMMARY**  
21

22 49  
23

24 50 **Strengths and limitations of this study**  
25

- 26 51 - In this study, we assessed how fruit or vegetable intake is related to cardiovascular  
27  
28 52 disease by assessing the indirect effect of systolic blood pressure, total cholesterol, and  
29  
30 53 fasting glucose, including body mass index. This topic was a less interesting part so far,  
31  
32 54 so the study has scientific value.  
33  
34 55 - Using national representative data source, we sought to generalize the research findings.  
35  
36 56 - But, this results were derived from a cross-sectional study design, so causal  
37  
38 57 relationships could not be effectively drawn. Therefore, it is necessary to pay attention  
39  
40 58 to interpretation of research results.  
41  
42 59  
43  
44 60  
45  
46 61  
47  
48 62  
49  
50 63  
51  
52  
53

## 64 INTRODUCTION

65  
66 Cardiovascular diseases (CVDs) are responsible for mortality worldwide; a report from  
67 the World Health Organization stated that CVDs accounted for 31% of all deaths worldwide  
68 in 2015 [1]. Although mortality from ischemic heart disease has shown a flat trend and that  
69 from cerebrovascular disease has shown a declining trend in the Republic of Korea since  
70 2005, these causes of death remain highly ranked [2].

71 Several risk factors for CVDs, including metabolic factors, such as high glucose, high  
72 blood pressure, and high cholesterol, have been suggested [3]. Several studies have suggested  
73 that these metabolic factors are also linked to risk factors (e.g., body mass index [BMI] and  
74 dietary factors) and CVD risk as mediators [4, 5]. The causal link between these mediators  
75 and disease risk can help explain how intervention of risk factors works. However, previous  
76 studies focused on a single relationship between a risk factor and a disease rather than the  
77 mediating effects.

78 Excessive risk for CVD caused by poor diet and chronic diseases was reported from a  
79 study of global burden of disease (GBD). In addition, the GBD study established possible  
80 causal mediating relationships between a diet poor in fruits or vegetables, metabolic  
81 mediators (blood pressure, cholesterol, and glucose), and disease [4]. Moreover, a recent  
82 meta-analysis reported that the beneficial effects of fruits and vegetables intake were also  
83 shown in CVD, as well as in cancer and all-cause mortality [6]. The metabolic mediators  
84 mentioned above have also been linked to BMI and CVD [4]. The effect of a diet rich in  
85 fruits and vegetables on BMI has been reported through epidemiological studies [7], but few  
86 studies have assessed BMI as a mediator.

1  
2  
3  
4 87 There is a need to study the degree to which these metabolic factors contribute to the  
5  
6 88 relationship between risk factors and disease. Although the evidence for the association  
7  
8 89 between fruit/vegetable intake and CVD is relatively strong [8, 9], clarifying the potential  
9  
10 90 biological pathway mechanisms could substantially add to our knowledge. Thus, using cross-  
11  
12 91 sectional survey data from the 2013–2015 Korean National Health and Nutrition Examination  
13  
14 92 Survey (KNHANES), we assessed the mediating effects of metabolic components applied to  
15  
16 93 a confirmatory model. Furthermore, we assessed how the BMI contributes to the relationship  
17  
18 94 between fruit or vegetable intake and CVD as a confounder or mediator.  
19  
20  
21 95  
22  
23 96  
24  
25  
26 97  
27  
28  
29 98  
30  
31  
32 99  
33  
34  
35 100  
36  
37  
38 101  
39  
40  
41 102  
42  
43  
44 103  
45  
46  
47 104  
48  
49  
50 105  
51  
52  
53 106

## 107 **METHODS**

### 109 **1. Study subjects**

110 This study was conducted using data from the 2013–2015 KNHANES, which is a  
111 national representative cross-sectional survey to assess health and nutritional status in the  
112 Korean population (response rate=78.3%). It consists of a health interview, health  
113 examination, and a nutrition survey. A number of variables were collected by trained staff,  
114 including physicians, medical technicians, and dieticians. The detailed KNHANES survey  
115 method has already been described [10].

116 The food frequency questionnaire (FFQ) was changed to a dish-based semi-quantitative  
117 FFQ based on a 2012 survey. The survey assessed subjects 19–64 years of age. Details  
118 regarding the development process and validation results of the FFQ tool have been  
119 previously published elsewhere [11, 12]. We used the sixth survey from 2013 to 2015 by  
120 sampling according to the survey cycle. This study included subjects  $\geq 25$  years.  
121 Additionally, the eligible study population included the respondents with data from all three  
122 parts of the survey. Of the subjects aged 25-64 who participated in the survey (n=12,258), 73.7%  
123 participated in all three parts of the survey. A total of 9,040 subjects (3,555 males and 5,485  
124 females) were included in the study. The study protocol was approved by the Institutional  
125 Review Board of the Ewha Womans University Hospital.

### 127 **2. Fruit and vegetable intake**

128 The dish-based semi-quantitative FFQ was composed of 112 items and provided  
129 information on typical dietary consumption for 1 year using a 9-point scale (less than once



1  
2  
3  
4 130 per month or never, once per month, 2–3 times per month, once per week, 2–4 times per  
5  
6 131 week, 5–6 times per week, once per day, twice per day, and three times per day) and three  
7  
8 132 levels to represent the amount consumed by referring to a standard amount (less, standard,  
9  
10 133 and more). Based on a previous study [4], we excluded pickled and salted vegetables, kimchi,  
11  
12 134 and fruit juice. Vegetable intake and fruit intake were evaluated based on 15 items and 12  
13  
14 135 items, respectively (Supplemental Tables 1). The frequency of fruit intake was used after  
15  
16 136 adjusting for seasonal fruit. Estimated intakes of fruits and vegetables were calculated on the  
17  
18 137 FFQ by multiplying the frequency of each food (as described above) by the selected amount  
19  
20 138 consumed: small (0.5), medium (1), and large (1.5). Fruit and vegetable intake was expressed  
21  
22 139 in four categories (< 1 time/d, 1 time/d, 2 times/d, and  $\geq 3$  times/d).  
23  
24  
25  
26  
27

### 141 **3. Outcome and covariate data**

142 We used data from the health-related questionnaire for the diseases diagnosed by  
143 physicians. We selected the questions about stroke, myocardial infarction, and angina pectoris  
144 for the CVD-related diseases. If a subject answered “yes” to any of the three diseases, we  
145 considered that the subject had CVD. Additionally, we separately considered subjects who  
146 answered “yes” on the question about current illness with a physician’s diagnosis and those  
147 who responded “yes” to a question about receiving treatment for a disease.

148 Using the measured height and weight information, BMI was calculated in units of  $\text{kg}/\text{m}^2$ .  
149 Blood pressure was measured three times in total and the average value of the second and  
150 third measurements was used. Total cholesterol and glucose were measured by taking blood  
151 from fasting state.

152 We used data on sex, age, quartiles of income, region (urban/rural), current smoker, and

1  
2  
3  
4 153 survey year as covariates through a literature review [13] and the results of a univariate  
5  
6 154 analysis. We used quartile data for income instead of education level as a socioeconomic  
7  
8 155 indicator because income may be directly linked to food purchases [14]. The question about  
9  
10 156 physical activity was changed from the 2014 survey, so we did not consider physical activity.  
11  
12  
13  
14

#### 15 158 **4. Statistical analysis**

16  
17 159 The basic characteristics of the study subjects are presented as weighted percentages or  
18  
19 160 weighted means with standard errors by considering the multi-stage sampling survey method.  
20  
21 161 The distributions of the basic characteristics according to fruit or vegetable intake level were  
22  
23 162 assessed using the trend test under the random sampling condition. In the main analysis, CVD  
24  
25 163 was considered the outcome (Y) and fruit or vegetable intake was considered an independent  
26  
27 164 variable (X). Systolic blood pressure (SBP) ( $M_1$ ), total cholesterol ( $M_2$ ), and fasting glucose  
28  
29 165 ( $M_3$ ) were applied as metabolic mediators (M). Additionally, BMI was considered as either a  
30  
31 166 covariate or mediator.  
32  
33

34 167 We used the "process" macro based on the bootstrap method (ver. V2.16.3) suggested by  
35  
36 168 Andrew to assess the mediating effects [15]. In this analysis, we applied 10,000 bootstraps.  
37  
38 169 We separately or simultaneously assessed the indirect effect of the metabolic mediators on the  
39  
40 170 association between dietary factors and CVD. Firstly, we examined the association under the  
41  
42 171 controlling covariates (sex, age, income, region [urban/rural], present smoking, and survey  
43  
44 172 year) through four basic steps to assess mediation [16]. Step 1: association between dietary  
45  
46 173 factors and CVD ( $X \rightarrow Y$ ; total effect and was marked path "c"); step 2: association between  
47  
48 174 dietary factors and metabolic mediators ( $X \rightarrow M_i$ ; marked path "a"); step 3: association  
49  
50 175 between metabolic mediators and CVD after controlling for metabolic mediators ( $M_i \rightarrow Y$ ;  
51  
52  
53  
54  
55  
56  
57  
58  
59  
60

1  
2  
3  
4 176 marked path “b”); and step 4: association between dietary factors and CVD disease after  
5  
6 177 controlling for metabolic mediators (direct effect; marked path “c”). Subsequently, we  
7  
8 178 evaluated the multiple mediator model and the serial mediator model.  
9

10 179 The exponential regression coefficient is equal to the odds ratio (OR) when considering  
11  
12 180 the CVD as an outcome variable. The percentage of risk mediated by the metabolic mediator  
13  
14 181 was calculated as [17]:  $OR(\text{confounder adjusted}) - OR(\text{confounder and mediator}$   
15  
16 182  $\text{adjusted}) / OR(\text{confounder adjusted}) - 1 \times 100$ .  
17

18  
19 183 All statistical analyses were conducted under a random sampling condition excluding the  
20  
21 184 basic characteristics given in Table 1 using SAS ver. 9.4 software (SAS Institute, Cary, NC,  
22  
23 185 USA). A two-sided  $p$ -value  $< 0.05$  was considered significant.  
24

25 186

26  
27 187

28  
29 188

30 189

31 190

32 191

33 192

34 193

35 194

36 195

37 196

38 197

39 198

1  
2  
3  
4 199 **RESULTS**  
5  
6

7 200

8  
9  
10 201 The basic characteristics of the study subjects are presented in Table 1. Mean age was  
11  
12 202 43.7 years, and 1.81% of subjects (n=189) had CVD. In addition, 0.98% and 0.90% of  
13  
14 203 subject had stroke (n=102) and ischemic heart disease (n=97), respectively. Subjects with a  
15  
16 204 higher income ate more fruits or vegetables than those with a lower income. Those who ate  
17  
18 205 more fruit were more likely to be non-smokers and female than their counterparts  
19  
20 206 (Supplemental Tables 2, 3).  
21  
22

23 207 The total effect of fruit intake on CVD showed an inverse association without controlling  
24  
25 208 for metabolic mediators (adjusted odds ratio [aOR], 0.86, 95% CI: 0.74–0.98), but the effect  
26  
27 209 of vegetable intake was not significant (aOR, 0.93; 95% CI: 0.81–1.06) after controlling for  
28  
29 210 sex, age, income, region (urban/rural), current smoker, and survey year (data not shown).  
30  
31  
32

33 211 The direct effect of fruit intake on CVD was borderline significant after further  
34  
35 212 considering each metabolic mediator. The effect of fruit intake on SBP ( $X \rightarrow M$ ) and the  
36  
37 213 effect of SBP on CVD ( $M \rightarrow Y$ ) were significant, and subsequently the indirect effect of SBP  
38  
39 214 did not include zero in the 95% CI range, unlikely other metabolic mediators. The effect of  
40  
41 215 fruit intake on BMI showed borderline significance, and the effect of BMI on CVD was  
42  
43 216 significant, but the indirect effect of BMI was not significant. Additionally, the effect of SBP  
44  
45 217 was significant even after controlling for BMI as a covariate (Table 2). SBP, cholesterol, and  
46  
47 218 BMI were associated with CVD, but vegetable intake did not contribute to either metabolic  
48  
49 219 mediator or CVD (Table 3). The mediating effect of SBP on the association between fruit  
50  
51 220 intake and outcome was dominant even when the outcome was restricted to those with a  
52  
53  
54

221 current illness or undergoing treatment.

222 When the beta coefficient was expressed as OR, the OR of the effect of fruit intake on  
223 CVD was attenuated to 0.89 (95% CI: 0.77–1.03) while simultaneously controlling for three  
224 metabolic mediators, indicating a 21.4% indirect effect for CVD (i.e.  $(0.8555-0.8864)/(0.8555-1)*100=21.4\%$ ). SBP showed an independent indirect effect. Higher fruit  
225 intake had a beneficial effect on fasting glucose, but its effect was not associated with CVD.  
226 The direct effect of fruit intake on CVD presented an inverse association ( $\beta=-0.121, p=0.11$ ),  
227 but it did not reach statistical significance (Figure 1). In addition, similar results were  
228 observed when adding BMI as covariate, with an OR (the effect of fruit intake on CVD) of  
229 0.90 (95% CI: 0.78–1.04; data not shown). The indirect effect of the four metabolic factors  
230 accounted for 30.0% of the relationship between fruit intake and CVD (i.e.  $(0.8555-0.8989)/(0.8555-1)*100=30.0\%$ ).  
231  
232

233 We analyzed the serial mediator model to assess whether BMI influenced SBP (Figure 2).  
234 Although the effect of fruit intake on BMI showed borderline significance, the influence of  
235 BMI on SBP, and the effect of SBP on CVD reached statistical significance. Of the three  
236 possible indirect paths, the fruit intake path  $\rightarrow$  SBP  $\rightarrow$  CVD was the only one to show an  
237 independent association.

238 Fruit intake was directly linked to subjects who suffered a stroke, but not ischemic heart  
239 disease, regardless of which metabolic factors were controlled. In addition, the mediating  
240 effect of SBP was dominant in patients who suffered a stroke or ischemic heart disease even  
241 after controlling for BMI (Supplemental Tables 4, 5).

242

1  
2  
3  
4 243 **DISCUSSION**

5  
6  
7 244

8  
9 245 In this study, we assessed how fruit or vegetable intake is related to CVD by assessing  
10  
11 246 the indirect effect of metabolic mediators. Based on the suggested causal link, SBP, total  
12  
13 247 cholesterol, and fasting glucose were considered metabolic mediators, and the effect of BMI  
14  
15 248 was additionally assessed. Of them, the indirect effect of SBP on the relationship between  
16  
17 249 fruit intake and CVD was significant even after considering BMI, but not vegetable intake.  
18  
19 250 The indirect effect of the four metabolic factors accounted for 30.0% of the relationship  
20  
21 251 between fruit intake and CVD.

22  
23  
24 252 The beneficial effects of high fruit or vegetable intake on CVD and the unfavorable  
25  
26 253 effects of high blood pressure, glucose, and cholesterol on CVD are well known. Thus,  
27  
28 254 previous studies considered metabolic factors together, and mediators were reported to  
29  
30 255 attenuate the association of a direct effect [5]. One large prospective study conducted in 10  
31  
32 256 regions in China indicated that higher fresh fruit intake is linked to CVD death, and its effect  
33  
34 257 was attenuated by hazard ratios from 0.63 (95% CI: 0.56–0.72) to 0.70 (95% CI: 0.61–0.79)  
35  
36 258 after adjusting for BMI, blood pressure, glucose, and waist circumference [18]. Another study  
37  
38 259 conducted in Shanghai, China showed an attenuated association between fruit intake and  
39  
40 260 incident coronary heart disease after controlling for a history of diabetes, hypertension, or  
41  
42 261 dyslipidemia, but no association or attenuation was observed for vegetable intake [5]. The  
43  
44 262 Women's Health Study reported by Liu et al. also showed that the effect of fruits and  
45  
46 263 vegetables on CVD risk became stronger after excluding subjects with a history of diabetes,  
47  
48 264 hypertension, and high cholesterol [19]. It seems that these mediators largely attribute to the  
49  
50 265 relationship between fruit and/or vegetable intake and CVD risk. However, biological  
51  
52  
53

1  
2  
3  
4 266 pathways by metabolic factors between fruit and/or vegetable intake and CVD risk have not  
5  
6 267 been investigated.

7  
8 268 The assessment of a mediating effect could help understand how fruit and/or vegetable  
9  
10 269 intake affects CVDs. In addition, an effect of poor dietary risk by metabolic mediators on  
11  
12 270 CVD was suggested by the GBD study, so that was considered to estimate the disease burden.  
13  
14 271 The mediating effect of blood pressure on the association between fruit and/or vegetable  
15  
16 272 intake and CVD was suggested by a prospective cohort study of patients in the first National  
17  
18 273 Health and Nutrition Examination Survey [13]. Blood pressure contributed 22.2% to the  
19  
20 274 relationship between fruit and vegetable intake and CVD death. This was similar to the  
21  
22 275 results adjusted for BMI, cholesterol, and blood pressure. That study also showed that the  
23  
24 276 direct effect of fruit and vegetable intake was notable in patients who suffered a stroke but  
25  
26 277 not those with ischemic heart disease. These results are in line with those of the present study.

27  
28  
29 278 We assessed a potential role for BMI on the association between fruit intake and CVD  
30  
31 279 using various models. Several reports, including the above-mentioned study, considered BMI  
32  
33 280 as a potential mediator [13, 18]. Additionally, a causal link between BMI and CVD risk is  
34  
35 281 mediated through metabolic factors. Two pooled studies of prospective cohorts assessed the  
36  
37 282 effect of BMI on coronary heart disease and stroke as mediated by metabolic components.  
38  
39 283 They reported that blood pressure was a more important mediator compared to cholesterol  
40  
41 284 and glucose [17, 20]. Other pooled data from an Asian cohort also indicate that estimated  
42  
43 285 mediating proportions through hypertension were 62.3, 35.7, and 92.4% for the association  
44  
45 286 between BMI and death due to CVD, coronary heart disease, and stroke, respectively, but not  
46  
47 287 by diabetes [21]. The GBD study restricted total calories to 2,000 kcal instead of considering  
48  
49 288 BMI [22]. In the present study, higher fruit intake was inversely associated with BMI, but it  
50  
51  
52  
53  
54  
55  
56  
57  
58  
59  
60

1  
2  
3  
4 289 was borderline significant ( $\beta = -0.06$ ,  $p = 0.08$ ), which affected the results of the fruit intake  
5  
6 290 path  $\rightarrow$  BMI  $\rightarrow$  SBP  $\rightarrow$  CVD in the serial multiple mediator model. Our study found that the  
7  
8 291 mediating effect due to BMI was about 7.9%, but previous studies showed a  $< 3.0\%$   
9  
10 292 mediating effect by BMI on the association between fruit only or fruit and vegetable intake  
11  
12 293 and CVD deaths by presenting little change in the adjusted risk value [13, 18]. However, it is  
13  
14 294 difficult to make a direct comparison due to discrepancies in study design, study populations,  
15  
16 295 the definition of disease, and fruit and/or vegetable intake.

17  
18  
19 296 Eating more vegetables was not significantly associated with either a direct or indirect  
20  
21 297 effect. In Korea, vegetables in the general population are easily accessible by a side dish.  
22  
23 298 Indeed, statistics from the Organisation for Economic Co-operation and Development  
24  
25 299 (OECD) have reported that daily vegetable consumption among adults was the highest in  
26  
27 300 Korea [23]. However, the manner of preparation and/or cooking can influence nutrient  
28  
29 301 content [7]. The favorable effects of fruit and vegetable intake can be explained by nutrients,  
30  
31 302 such as dietary fiber, folate, potassium, and antioxidant vitamins (i.e., vitamin E, vitamin C,  
32  
33 303 polyphenols, flavonoids, and carotenoids) and other components. These nutrients might be  
34  
35 304 involved with controlling glucose, lipid level, and blood pressure, and reduce the risk of CVD  
36  
37 305 along with weight control [7]. However, because foods contain various nutrients, food  
38  
39 306 recommendations help subjects follow a prevention strategy. In addition, healthy eating is  
40  
41 307 also associated with other health behaviors, such as not smoking and regular physical activity  
42  
43 308 [13, 24].

44  
45  
46  
47 309 The present study has some limitations. First, the results were derived from a cross-  
48  
49 310 sectional study design, so causal relationships could not be effectively drawn. Our study  
50  
51 311 design is also open to the problem of reverse causation. If the reverse causation affects the  
52  
53  
54



1  
2  
3  
4 312 results, the association will appear to be null or reverse direction to what is expected. But, the  
5  
6 313 indirect effect by SBP was significant and some parts of our results were consistent with  
7  
8 314 previous studies [13, 24]. Furthermore, the results were also consistent when stroke and  
9  
10 315 ischemic heart disease were analyzed separately. Because the survey was conducted through  
11  
12 316 a household visit and excludes people in the hospital, subjects with diseases might be the  
13  
14 317 relatively less serious cases. Measurement error in FFQ survey or self-reported disease status  
15  
16 318 may influence the results. In addition, residual confounding factors such as physical activity  
17  
18 319 may have influenced the association. Finally, because the number of participants with CVD  
19  
20 320 was very low (1.8%), the study had inadequate statistical power which might explain some of the  
21  
22 321 non-significant findings.  
23  
24

25 322 Nevertheless, our study focused on the mediating effects of metabolic factors on CVD  
26  
27 323 and assessed which metabolic factors affect CVD. Our results were produced using the  
28  
29 324 bootstrapping method and did not impose the assumption of normality of the sampling  
30  
31 325 distribution; thus, it was an appropriate design for multiple mediations [16]. The given  
32  
33 326 evidence was conceptually approached and was not statistically tested for an indirect effect.  
34  
35

36 327 Taken together, our study suggests that diets rich in fruits may contribute to a lower  
37  
38 328 CVD risk partly through lowered systolic blood pressure. Further prospective studies are  
39  
40 329 needed for confirmation.  
41  
42  
43  
44  
45  
46  
47  
48  
49  
50  
51  
52  
53 334

1  
2  
3  
4 335 **Conflict of interest statement**  
5

6  
7 336 None  
8  
9

10 337  
11

12  
13 338 **Contributor ship statement**  
14

15 339 HA Lee wrote the manuscript and performed the statistical analyses; D Lim, K Oh, and EJ Kim,  
16  
17 340 provided advice about writing the manuscript, and H Park helped interpret the data.  
18  
19

20 341  
21

22  
23 342 **Funding statement**  
24

25  
26 343 This study was supported by a grant of the Korean Health Technology R&D Project, Ministry of  
27  
28 344 Health & Welfare, Republic of Korea (HI13C0729).  
29  
30

31 345  
32  
33

34 346 **Data availability**  
35

36  
37 347 The National Health and Nutrition Examination Survey files are available from the Korea Centers for Disease  
38  
39 348 Control and Prevention database (URL [https://knhanes.cdc.go.kr/knhanes/sub03/sub03\\_02\\_02.do](https://knhanes.cdc.go.kr/knhanes/sub03/sub03_02_02.do)). If you  
40  
41 349 register your e-mail on this site, you can freely download the raw data.  
42  
43

44 350  
45

46 351  
47  
48

49 352  
50

51  
52 353  
53

354 **REFERENCES**

355

356 1. World Health Organization (2017). Cardiovascular diseases Fact sheet.  
357 <http://www.who.int/mediacentre/factsheets/fs317/en/>. Accessed July 10, 2017.

358 2. Statistics Korea. Causes of Death Statistics in 2015.  
359 <http://kostat.go.kr/portal/eng/pressReleases/8/10/index.board?bmode=read&bSeq=&aSeq=357968&pageNo=1&rowNum=10&navCount=10&currPg=&sTarget=title&sTxt=>. Accessed  
360  
361 July 10, 2017.

362 3. Feigin VL, Roth GA, Naghavi M, Parmar P, Krishnamurthi R, Chugh S, Mensah  
363 GA, Norrving B, Shiue I, Ng M, Estep K, Cercy K, Murray CJL, Forouzanfar MH; Global  
364 Burden of Diseases, Injuries and Risk Factors Study 2013 and Stroke Experts Writing Group.  
365 Global burden of stroke and risk factors in 188 countries, during 1990–2013: a systematic  
366 analysis for the Global Burden of Disease Study 2013. *Lancet Neurol* 2016;15(9):913-924.  
367 doi: 10.1016/S1474-4422(16)30073-4. Epub 2016 Jun 9.

368 4. GBD 2015 Risk Factors Collaborators Global, regional, and national comparative risk  
369 assessment of 79 behavioural, environmental and occupational, and metabolic risks or  
370 clusters of risks, 1990-2015: a systematic analysis for the Global Burden of Disease Study  
371 2015. *Lancet* 2016;388(10053):1659-1724. doi: 10.1016/S0140-6736(16)31679-8.

372 5. Danxia Yu, Xianglan Zhang ,Yu-Tang Gao, Honglan Li, Gong Yang, Jie Huang, Wei  
373 Zheng, Yong-Bing Xiang, and Xiao-Ou Shu. Fruit and Vegetable Intake and Risk of Coronary  
374 Heart Disease: Results from Prospective Cohort Studies of Chinese Adults in Shanghai. *Br J*  
375 *Nutr* 2014; 111(2): 353–362.

376 6. Aune D, Giovannucci E, Boffetta P, Fadnes LT, Keum N, Norat T, Greenwood DC, Riboli  
377 E, Vatten LJ, Tonstad S. Fruit and vegetable intake and the risk of cardiovascular disease,  
378 total cancer and all-cause mortality-a systematic review and dose-response meta-analysis of  
379 prospective studies. *Int J Epidemiol*. 2017;46(3):1029-1056.

380 7. Bazzano LA. Dietary intake of fruit and vegetables and risk of diabetes mellitus and  
381 cardiovascular diseases. Geneva: World Health Organization, 2005.

382 8. Boeing H, Bechthold A, Bub A, Ellinger S, Haller D, Kroke A, Leschik-Bonnet E, Müller  
383 MJ, Oberritter H, Schulze M, Stehle P, Watzl B. Critical review: vegetables and fruit in the

- 1  
2  
3  
4 384 prevention of chronic diseases. *Eur J Nutr*. 2012;51(6):637-63. doi: 10.1007/s00394-012-  
5 385 0380-y.
- 7 386 9. Dauchet L, Amouyel P, Dallongeville J. Fruits, vegetables and coronary heart disease. *Nat*  
8  
9 387 *Rev Cardiol*. 2009;6(9):599-608. doi: 10.1038/nrcardio.2009.131.
- 11 388 10. Kweon S, Kim Y, Jang MJ, Kim Y, Kim K, Choi S, Chun C, Khang YH, Oh K. Data  
12 389 resource profile: the Korea National Health and Nutrition Examination Survey (KNHANES).  
13 390 *Int J Epidemiol* 2014;43(1):69-77. doi: 10.1093/ije/dyt228.
- 15 391 11. Kim DW, Song S, Lee JE, Oh K, Shim J, Kweon S, Paik HY, Joung H. Reproducibility  
16 392 and validity of an FFQ developed for the Korea National Health and Nutrition Examination  
17 393 Survey (KNHANES). *Public Health Nutr* 2015;18(8):1369-1377.
- 20 394 12. Yun SH, Shim JS, Kweon S, Oh, K. Development of a Food Frequency Questionnaire for  
21 395 the Korea National Health and Nutrition Examination Survey: Data from the Fourth Korea  
22 396 National Health and Nutrition Examination Survey (KNHANES IV). *Korean J Nutr* 2013;  
23 397 46(2): 186 ~ 196. (Korean)
- 26 398 13. Bazzano LA, He J, Ogden LG, Loria CM, Vupputuri S, Myers L, Whelton PK. Fruit and  
27 399 vegetable intake and risk of cardiovascular disease in US adults: the first National Health and  
28 400 Nutrition Examination Survey Epidemiologic Follow-up Study. *Am J Clin*  
29 401 *Nutr* 2002;76(1):93-9.
- 33 402 14. Darmon N, Drewnowski A. Does social class predict diet quality? *Am J Clin Nutr*  
34 403 2008;87(5):1107-1117.
- 36 404 15. Andrew F. Hayes. Introduction to mediation, Moderation, and conditional process  
37 405 analysis: a regression-based approach. The Guilford Press, New York, 2013
- 39 406 16. Preacher KJ, Hayes AF. Asymptotic and resampling strategies for assessing and  
40 407 comparing indirect effects in multiple mediator models. *Behav Res Methods* 2008;40(3):879-  
41 408 91.
- 44 409 17. Global Burden of Metabolic Risk Factors for Chronic Diseases Collaboration (BMI  
45 410 Mediated Effects), Lu Y, Hajifathalian K, Ezzati M, Woodward M, Rimm EB, Danaei G.  
46 411 Metabolic mediators of the effects of body-mass index, overweight, and obesity on coronary  
47 412 heart disease and stroke: a pooled analysis of 97 prospective cohorts with 1.8 million  
48 413 participants. *Lancet* 2014;383(9921):970-83. doi: 10.1016/S0140-6736(13)61836-X. Epub  
49 414 2013 Nov 22.

- 1  
2  
3  
4 415 18. Huaidong Du, Liming Li., Derrick Bennett, Yu Guo, Timothy J. Key, Zheng Bian, Paul  
5 416 Sherliker, Haiyan Gao, Yiping Chen, Ling Yang, Junshi Chen, Shanqing Wang, Ranran  
6 417 Du, Hua Su, Rory Collins, Richard Peto, Zhengming Chen, for the China Kadoorie  
7 418 Biobank Study. Fresh Fruit Consumption and Major Cardiovascular Disease in China. *N*  
8 419 *Engl J Med* 2016; 374(14): 1332–1343.
- 9  
10 420 19. Liu S, Manson JE, Lee IM, Cole SR, Hennekens CH, Willett WC, Buring JE. Fruit and  
11 421 vegetable intake and risk of cardiovascular disease: the Women's Health Study. *Am J Clin*  
12 422 *Nutr* 2000;72(4):922-8.
- 13 423 20. Lu Y, Hajifathalian K, Rimm EB, Ezzati M, Danaei G. Mediators of the Effect of Body  
14 424 Mass Index on Coronary Heart Disease: Decomposing Direct and Indirect Effects.  
15 425 *Epidemiology* 2015 ;26(2):153-62. doi: 10.1097/EDE.0000000000000234.
- 16 426 21. Chen Y, Copeland WK, Vedanthan R, Grant E, Lee JE, Gu D, Gupta PC, Ramadas  
17 427 K, Inoue M, Tsugane S, Tamakoshi A, Gao YT, Yuan JM, Shu XO, Ozasa K, Tsuji I, Kakizaki  
18 428 M, Tanaka H, Nishino Y, Chen CJ, Wang R, Yoo KY, Ahn YO, Ahsan H, Pan WH, Chen  
19 429 CS, Pednekar MS, Sauvaget C, Sasazuki S, Yang G, Koh WP, Xiang YB, Ohishi W, Watanabe  
20 430 T, Sugawara Y, Matsuo K, You SL, Park SK, Kim DH, Parvez F, Chuang SY, Ge W, Rolland  
21 431 B, McLerran D, Sinha R, Thornquist M, Kang D, Feng Z, Boffetta P, Zheng W, He J, Potter  
22 432 JD. Association between body mass index and cardiovascular disease mortality in east Asians  
23 433 and south Asians: pooled analysis of prospective data from the Asia Cohort Consortium.  
24 434 *BMJ* 2013;347:f5446. doi: 10.1136/bmj.f5446.
- 25 435 22. GBD 2013 Risk Factors Collaborators, Forouzanfar MH, Alexander L, Anderson  
26 436 HR, Bachman VF, Biryukov S, Brauer M, Burnett R, Casey D, Coates MM, et al. Global,  
27 437 regional, and national comparative risk assessment of 79 behavioural, environmental and  
28 438 occupational, and metabolic risks or clusters of risks in 188 countries, 1990–2013: a  
29 439 systematic analysis for the Global Burden of Disease Study 2013. *Lancet*  
30 440 2015;386(10010):2287-323. doi: 10.1016/S0140-6736(15)00128-2.
- 31 441 23. Organisation for Economic Co-operation and Development. Daily vegetable eating  
32 442 among adults, 2013 (or nearest year), in Health at a Glance 2015, OECD Publishing, Paris,  
33 443 2015. doi: [http://dx.doi.org/10.1787/health\\_glance-2015-graph42-en](http://dx.doi.org/10.1787/health_glance-2015-graph42-en).
- 34 444 24. Takachi R, Inoue M, Ishihara J, Kurahashi N, Iwasaki M, Sasazuki S, Iso H, Tsubono  
35 445 Y, Tsugane S; JPHC Study Group. Fruit and vegetable intake and risk of total cancer and

1  
2  
3  
4 446 cardiovascular disease: Japan Public Health Center-Based Prospective Study. *Am J*  
5 447 *Epidemiol* 2008;167(1):59-70.  
6  
7 448  
8  
9  
10 449  
11  
12 450  
13  
14 451  
15  
16 452  
17  
18 453  
19  
20 454  
21  
22 455  
23  
24 456  
25  
26 457  
27  
28 458  
29  
30 459  
31  
32 460  
33  
34 461  
35  
36 462  
37  
38 463  
39  
40 464  
41  
42 465  
43  
44 466  
45  
46 467  
47  
48  
49  
50  
51  
52  
53  
54  
55  
56  
57  
58  
59  
60

For peer review only

1  
2  
3  
4 468 **Figure Legends**

5  
6  
7 469

8  
9  
10 470 Figure 1. The effect of multiple metabolic factor ( $M_i$ ) mediators in the association between  
11  
12 471 fruit intake (X) and cardiovascular diseases (Y).

13  
14  
15 472 <sup>a</sup> $p < 0.01$ , <sup>b</sup> $p < 0.001$ , SBP: systolic blood pressure. Coefficients were adjusted for sex, age,  
16  
17 473 income, region (urban/rural), current smoker, and survey year using the bootstrapping method.

18  
19 474

20  
21  
22 475 Figure 2. The effect of multiple serial mediators of metabolic factors ( $M_i$ ) in the association  
23  
24 476 between fruit intake (X) and cardiovascular diseases (Y).

25  
26  
27 477 <sup>a</sup> $p < 0.1$ , <sup>b</sup> $p < 0.05$ , <sup>c</sup> $p < 0.01$ , <sup>d</sup> $p < 0.001$ , BMI: body mass index, SBP: systolic blood pressure.  
28  
29 478 Coefficients were adjusted for sex, age, income, region (urban/rural), current smoker, and  
30  
31 479 survey year using the bootstrapping method.

32  
33 480

34  
35  
36 481

37  
38  
39 482

40  
41  
42 483

43  
44  
45 484

46  
47  
48 485

49  
50  
51 486

487 Table 1. Basic characteristics of the study subjects.

|                                      | Weighted % (SE) |
|--------------------------------------|-----------------|
| <b>Sex</b>                           |                 |
| Male                                 | 49.92 (0.51)    |
| Female                               | 50.08 (0.51)    |
| <b>Age range</b>                     |                 |
| Age (years)†                         | 25–64 years     |
|                                      | 43.68 (0.18)    |
| <b>Region</b>                        |                 |
| Urban                                | 83.87 (1.52)    |
| Rural                                | 16.13 (1.52)    |
| <b>Income level (quartiles)</b>      |                 |
| Q1                                   | 23.46 (0.73)    |
| Q2                                   | 25.61 (0.72)    |
| Q3                                   | 25.03 (0.71)    |
| Q4                                   | 25.90 (0.97)    |
| <b>Current smoking</b>               |                 |
| No                                   | 75.83 (0.60)    |
| Yes                                  | 24.17 (0.60)    |
| <b>Disease</b>                       |                 |
| Cardiovascular disease               | 1.81 (0.16)     |
| Stroke                               | 0.98 (0.13)     |
| Ischemic heart disease               | 0.90 (0.10)     |
| <b>Metabolic Factors†</b>            |                 |
| Systolic blood pressure (mmHg)       | 115.01 (0.21)   |
| Total cholesterol (mg/dL)            | 190.98 (0.47)   |
| Fasting plasma glucose (mg/dL)       | 98.58 (0.30)    |
| Body mass index (kg/m <sup>2</sup> ) | 23.92 (0.05)    |

488

489 SE: Standard error.

490 †Weighted mean with standard error.

491

492

493

494

495

496

497

498



499 Table 2. The effect of metabolic mediators (M) in the association between fruit intake (X) and  
500 cardiovascular disease (Y).

| Metabolic Factors (M) | Fruit intake |       |          |           |       |          |                            |       |          |                       |        |         |
|-----------------------|--------------|-------|----------|-----------|-------|----------|----------------------------|-------|----------|-----------------------|--------|---------|
|                       | X → M (a)    |       |          | M → Y (b) |       |          | X → Y (c' = direct effect) |       |          | Indirect effect (a*b) |        |         |
|                       | $\beta$      | SE    | <i>p</i> | $\beta$   | SE    | <i>p</i> | $\beta$                    | SE    | <i>p</i> | $\beta$               | 95% CI |         |
| SBP <sup>a</sup>      | -0.484       | 0.144 | 0.001    | 0.013     | 0.004 | 0.002    | -0.137                     | 0.072 | 0.06     | -0.007                | -0.014 | -0.002  |
| TC <sup>a</sup>       | -0.156       | 0.357 | 0.66     | -0.019    | 0.003 | <.0001   | -0.144                     | 0.075 | 0.05     | 0.003                 | -0.011 | 0.017   |
| FPG <sup>a</sup>      | -0.665       | 0.217 | <.01     | 0.004     | 0.003 | 0.20     | -0.144                     | 0.074 | 0.05     | -0.002                | -0.006 | 0.001   |
| BMI <sup>a</sup>      | -0.059       | 0.034 | 0.08     | 0.078     | 0.022 | 0.001    | -0.143                     | 0.072 | <.05     | -0.005                | -0.012 | 0.001   |
| SBP <sup>b</sup>      | -0.420       | 0.139 | <.01     | 0.011     | 0.005 | 0.01     | -0.127                     | 0.072 | 0.08     | -0.005                | -0.011 | -0.0004 |
| TC <sup>b</sup>       | -0.064       | 0.352 | 0.86     | -0.019    | 0.003 | <.0001   | -0.126                     | 0.075 | 0.09     | 0.001                 | -0.012 | 0.015   |
| FPG <sup>b</sup>      | -0.614       | 0.214 | <.01     | 0.002     | 0.003 | 0.42     | -0.130                     | 0.074 | 0.08     | -0.002                | -0.005 | 0.002   |

501

502 SBP: systolic blood pressure, TC: total cholesterol, FPG: fasting plasma glucose, BMI: body mass  
503 index, SE: standard error, 95% CI: 95% confidence interval.

504 <sup>a</sup>Adjusted for sex, age, income, region (urban/rural), current smoking, and survey year.

505 <sup>b</sup>Adjusted for sex, age, income, region (urban/rural), current smoking, survey year, and body mass  
506 index.

507 All analyzes were performed separately according to each metabolic mediator.

508

509

510

511

512

513

514

515

516

517

518

519

520

521 Table 3. The effect of metabolic mediators (M) in the association between vegetable intake  
522 (X) and cardiovascular disease (Y).

| Metabolic Factors (M) | Vegetable intake |       |          |           |       |          |                            |       |          |                       |              |
|-----------------------|------------------|-------|----------|-----------|-------|----------|----------------------------|-------|----------|-----------------------|--------------|
|                       | X → M (a)        |       |          | M → Y (b) |       |          | X → Y (c' = direct effect) |       |          | Indirect effect (a*b) |              |
|                       | $\beta$          | SE    | <i>p</i> | $\beta$   | SE    | <i>p</i> | $\beta$                    | SE    | <i>p</i> | $\beta$               | 95% CI       |
| SBP <sup>a</sup>      | -0.042           | 0.169 | 0.80     | 0.014     | 0.004 | 0.002    | -0.132                     | 0.086 | 0.13     | -0.001                | -0.006 0.004 |
| TC <sup>a</sup>       | 0.236            | 0.420 | 0.57     | -0.019    | 0.003 | <.0001   | -0.121                     | 0.089 | 0.18     | -0.005                | -0.021 0.012 |
| FPG <sup>a</sup>      | -0.054           | 0.256 | 0.83     | 0.004     | 0.003 | 0.18     | -0.132                     | 0.088 | 0.14     | -0.0002               | -0.003 0.002 |
| BMI <sup>a</sup>      | 0.057            | 0.040 | 0.16     | 0.080     | 0.022 | <.001    | -0.145                     | 0.086 | 0.09     | 0.005                 | -0.002 0.013 |
| SBP <sup>b</sup>      | -0.114           | 0.163 | 0.48     | 0.012     | 0.005 | 0.01     | -0.131                     | 0.086 | 0.13     | -0.001                | -0.006 0.002 |
| TC <sup>b</sup>       | 0.142            | 0.415 | 0.73     | -0.019    | 0.003 | <.0001   | -0.122                     | 0.089 | 0.17     | -0.003                | -0.019 0.014 |
| FPG <sup>b</sup>      | -0.121           | 0.252 | 0.63     | 0.003     | 0.003 | 0.4      | -0.132                     | 0.088 | 0.14     | -0.0003               | -0.003 0.002 |

523 SBP: systolic blood pressure, TC: total cholesterol, FPG: fasting plasma glucose, BMI: body mass  
524 index, SE: standard error, 95% CI: 95% confidence interval.

525 <sup>a</sup>Adjusted for sex, age, income, region (urban/rural), current smoking, and survey year.

526 <sup>b</sup>Adjusted for sex, age, income, region (urban/rural), current smoking, survey year, and body mass  
527 index.

528 All analyzes were performed separately according to each metabolic mediator.

529

530

531

532

533

534

535

536

537

538

539

540

541

Figure 1



figure1

254x190mm (300 x 300 DPI)

Figure 2



<sup>a</sup>  $p < 0.1$ , <sup>b</sup>  $p < 0.05$ , <sup>c</sup>  $p < 0.01$ , <sup>d</sup>  $p < 0.001$

figure2

254x190mm (300 x 300 DPI)

Supplemental Table 1. List of fruit or vegetable related food items

| Fruit                      | Vegetable                                                           |
|----------------------------|---------------------------------------------------------------------|
| Strawberry                 | Bean sprouts (seasoned, soup)                                       |
| Melon                      | Seasoned mung bean sprout                                           |
| Watermelon                 | Seasoned spinach                                                    |
| Peach                      | Seasoned bellflower (boiled or not)                                 |
| Grape                      | Pumpkin (seasoned, pan-fried)                                       |
| Apple                      | Other seasoned vegetables                                           |
| Pear                       | Cucumber (seasoned, raw)                                            |
| Persimmon, dried persimmon | Radish (seasoned, pickled, dried)                                   |
| Tangerine                  | Vegetable salad                                                     |
| Banana                     | Seasoned green onion, and seasoned Chinese chives                   |
| Orange                     | Raw vegetables (lettuce, sesame, Chinese cabbage, and pumpkin leaf) |
| Kiwi                       | Green pepper                                                        |
|                            | Boiled broccoli, boiled cabbage                                     |
|                            | Garlic                                                              |
|                            | Tomato, and cherry tomato                                           |

The food frequency questionnaire consists of dietary consumption using a 9-point scale (less than once per month or never, once per month, 2–3 times per month, once per week, 2–4 times per week, 5–6 times per week, once per day, twice per day, and three times per day) and three levels to represent the amount consumed by referring to a standard amount (less, standard, and more).

Supplemental Table 2. Distribution of basic characteristics by fruit intake.

|                                 | Fruit intake |       |            |       |             |       |              |       | <i>p</i> <sub>trend</sub> |
|---------------------------------|--------------|-------|------------|-------|-------------|-------|--------------|-------|---------------------------|
|                                 | < 1 time/day |       | 1 time/day |       | 2 times/day |       | 3+ times/day |       |                           |
|                                 | n            | %     | n          | %     | n           | %     | n            | %     |                           |
| <b>Survey year</b>              |              |       |            |       |             |       |              |       |                           |
| 2013                            | 961          | 29.61 | 935        | 28.8  | 629         | 19.38 | 721          | 22.21 | 0.03                      |
| 2014                            | 945          | 31.81 | 825        | 27.77 | 538         | 18.11 | 663          | 22.32 |                           |
| 2015                            | 916          | 32.45 | 810        | 28.69 | 488         | 17.29 | 609          | 21.57 |                           |
| <b>Sex</b>                      |              |       |            |       |             |       |              |       |                           |
| Male                            | 1519         | 42.73 | 983        | 27.65 | 551         | 15.5  | 502          | 14.12 | <.0001                    |
| Female                          | 1303         | 23.76 | 1587       | 28.93 | 1104        | 20.13 | 1491         | 27.18 |                           |
| <b>Age (years)</b>              | 45.83        | 10.97 | 45.38      | 10.94 | 45.76       | 10.69 | 46.53        | 10.81 | 0.02                      |
| <b>Region</b>                   |              |       |            |       |             |       |              |       |                           |
| Urban                           | 2280         | 30.62 | 2118       | 28.44 | 1389        | 18.65 | 1660         | 22.29 | <.01                      |
| Rural                           | 542          | 34.02 | 452        | 28.37 | 266         | 16.7  | 333          | 20.9  |                           |
| <b>Income level (quartiles)</b> |              |       |            |       |             |       |              |       |                           |
| Q1                              | 863          | 40.29 | 574        | 26.8  | 354         | 16.53 | 351          | 16.39 | <.0001                    |
| Q2                              | 827          | 36.38 | 634        | 27.89 | 359         | 15.79 | 453          | 19.93 |                           |
| Q3                              | 612          | 26.9  | 702        | 30.86 | 435         | 19.12 | 526          | 23.12 |                           |
| Q4                              | 510          | 22.02 | 649        | 28.02 | 500         | 21.59 | 657          | 28.37 |                           |
| <b>Current smoking</b>          |              |       |            |       |             |       |              |       |                           |
| No                              | 1826         | 26.21 | 2030       | 29.14 | 1377        | 19.77 | 1733         | 24.88 | <.0001                    |
| Yes                             | 833          | 50.24 | 431        | 26    | 210         | 12.67 | 184          | 11.1  |                           |

Supplemental Table 3. Distribution of basic characteristics by vegetable intake.

|                                 | Vegetable intake |       |            |       |             |       |              |       | <i>p</i> <sub>trend</sub> |
|---------------------------------|------------------|-------|------------|-------|-------------|-------|--------------|-------|---------------------------|
|                                 | < 1 time/day     |       | 1 time/day |       | 2 times/day |       | 3+ times/day |       |                           |
|                                 | n                | %     | n          | %     | n           | %     | n            | %     |                           |
| <b>Survey year</b>              |                  |       |            |       |             |       |              |       |                           |
| 2013                            | 357              | 11    | 711        | 21.9  | 674         | 20.76 | 1504         | 46.33 | <.0001                    |
| 2014                            | 374              | 12.59 | 725        | 24.4  | 585         | 19.69 | 1287         | 43.32 |                           |
| 2015                            | 382              | 13.53 | 724        | 25.65 | 574         | 20.33 | 1143         | 40.49 |                           |
| <b>Sex</b>                      |                  |       |            |       |             |       |              |       |                           |
| Male                            | 428              | 12.04 | 892        | 25.09 | 709         | 19.94 | 1526         | 42.93 | 0.38                      |
| Female                          | 685              | 12.49 | 1268       | 23.12 | 1124        | 20.49 | 2408         | 43.9  |                           |
| <b>Age (years)</b>              | 45.54            | 11.70 | 45.11      | 10.93 | 45.49       | 10.93 | 46.49        | 10.55 | <.0001                    |
| <b>Region</b>                   |                  |       |            |       |             |       |              |       |                           |
| Urban                           | 910              | 12.22 | 1775       | 23.84 | 1526        | 20.49 | 3236         | 43.45 | 0.73                      |
| Rural                           | 203              | 12.74 | 385        | 24.17 | 307         | 19.27 | 698          | 43.82 |                           |
| <b>Income level (quartiles)</b> |                  |       |            |       |             |       |              |       |                           |
| Q1                              | 394              | 18.39 | 550        | 25.68 | 391         | 18.25 | 807          | 37.68 | <.0001                    |
| Q2                              | 288              | 12.67 | 587        | 25.82 | 481         | 21.16 | 917          | 40.34 |                           |
| Q3                              | 239              | 10.51 | 529        | 23.25 | 485         | 21.32 | 1022         | 44.92 |                           |
| Q4                              | 187              | 8.07  | 486        | 20.98 | 468         | 20.21 | 1175         | 50.73 |                           |
| <b>Current smoker</b>           |                  |       |            |       |             |       |              |       |                           |
| No                              | 810              | 11.63 | 1668       | 23.94 | 1421        | 20.4  | 3067         | 44.03 | <.01                      |
| Yes                             | 248              | 14.96 | 392        | 23.64 | 325         | 19.6  | 693          | 41.8  |                           |

Supplemental Table 4. The effect of metabolic mediators (M) in the association between fruit intake (X) and stroke (Y).

| Metabolic Factors (M) | Fruit intake |       |          |           |       |          |                            |       |          |                       |        |        |
|-----------------------|--------------|-------|----------|-----------|-------|----------|----------------------------|-------|----------|-----------------------|--------|--------|
|                       | X → M (a)    |       |          | M → Y (b) |       |          | X → Y (c' = direct effect) |       |          | Indirect effect (a*b) |        |        |
|                       | $\beta$      | SE    | <i>p</i> | $\beta$   | SE    | <i>p</i> | $\beta$                    | SE    | <i>p</i> | $\beta$               | 95% CI |        |
| SBP <sup>a</sup>      | -0.484       | 0.144 | <.001    | 0.015     | 0.006 | <.01     | -0.242                     | 0.100 | 0.02     | -0.007                | -0.017 | -0.001 |
| TC <sup>a</sup>       | -0.156       | 0.357 | 0.66     | -0.018    | 0.003 | <.0001   | -0.268                     | 0.105 | 0.01     | 0.003                 | -0.009 | 0.016  |
| FPG <sup>a</sup>      | -0.665       | 0.217 | <.01     | 0.005     | 0.004 | 0.19     | -0.269                     | 0.105 | 0.01     | -0.003                | -0.008 | 0.002  |
| BMI <sup>a</sup>      | -0.059       | 0.034 | 0.08     | 0.074     | 0.029 | 0.01     | -0.249                     | 0.100 | 0.01     | -0.004                | -0.013 | 0.001  |
| SBP <sup>b</sup>      | -0.420       | 0.139 | <.01     | 0.013     | 0.006 | 0.03     | -0.238                     | 0.100 | 0.02     | -0.005                | -0.014 | 0.001  |
| TC <sup>b</sup>       | -0.064       | 0.352 | 0.86     | -0.018    | 0.003 | <.0001   | -0.255                     | 0.105 | 0.02     | 0.001                 | -0.011 | 0.015  |
| FPG <sup>b</sup>      | -0.614       | 0.214 | <.01     | 0.003     | 0.004 | 0.37     | -0.260                     | 0.105 | 0.01     | -0.002                | -0.007 | 0.004  |

SBP: systolic blood pressure, TC: total cholesterol, FPG: fasting plasma glucose, BMI: body mass index, SE: standard error, 95% CI: 95% confidence interval.

<sup>a</sup>Adjusted for sex, age, income, region (urban/rural), current smoking, and survey year.

<sup>b</sup>Adjusted for sex, age, income, region (urban/rural), current smoking, survey year, and body mass index.

All analyzes were performed separately according to each metabolic mediator.



Supplemental Table 5. The effect of metabolic mediators (M) in the association between fruit intake (X) and ischemic heart disease (Y).

| Metabolic Factors (M) | Fruit intake |       |          |           |       |          |                            |       |          |                       |        |         |
|-----------------------|--------------|-------|----------|-----------|-------|----------|----------------------------|-------|----------|-----------------------|--------|---------|
|                       | X → M (a)    |       |          | M → Y (b) |       |          | X → Y (c' = direct effect) |       |          | Indirect effect (a*b) |        |         |
|                       | $\beta$      | SE    | <i>p</i> | $\beta$   | SE    | <i>p</i> | $\beta$                    | SE    | <i>p</i> | $\beta$               | 95% CI |         |
| SBP <sup>a</sup>      | -0.484       | 0.144 | <.001    | 0.011     | 0.006 | 0.06     | -0.065                     | 0.097 | 0.51     | -0.006                | -0.013 | -0.0001 |
| TC <sup>a</sup>       | -0.156       | 0.357 | 0.66     | -0.021    | 0.003 | <.0001   | -0.042                     | 0.100 | 0.67     | 0.003                 | -0.012 | 0.019   |
| FPG <sup>a</sup>      | -0.665       | 0.217 | <.01     | 0.002     | 0.004 | 0.65     | -0.048                     | 0.099 | 0.63     | -0.001                | -0.006 | 0.004   |
| BMI <sup>a</sup>      | -0.059       | 0.034 | 0.08     | 0.079     | 0.031 | 0.01     | -0.069                     | 0.097 | 0.48     | -0.005                | -0.012 | 0.001   |
| SBP <sup>b</sup>      | -0.420       | 0.139 | <.01     | 0.010     | 0.006 | 0.12     | -0.047                     | 0.097 | 0.63     | -0.004                | -0.011 | 0.001   |
| TC <sup>b</sup>       | -0.064       | 0.352 | 0.86     | -0.020    | 0.003 | <.0001   | -0.018                     | 0.100 | 0.86     | 0.001                 | -0.013 | 0.016   |
| FPG <sup>b</sup>      | -0.614       | 0.214 | <.01     | 0.001     | 0.004 | 0.88     | -0.028                     | 0.099 | 0.78     | 0.000                 | -0.004 | 0.005   |

SBP: systolic blood pressure, TC: total cholesterol, FPG: fasting plasma glucose, BMI: body mass index, SE: standard error, 95% CI: 95% confidence interval.

<sup>a</sup>Adjusted for sex, age, income, region (urban/rural), current smoking, and survey year.

<sup>b</sup>Adjusted for sex, age, income, region (urban/rural), current smoking, survey year, and body mass index.

All analyzes were performed separately according to each metabolic mediator.

**STROBE 2007 (v4) Statement—Checklist of items that should be included in reports of *cross-sectional studies***

| Section/Topic                | Item # | Recommendation                                                                                                                                                                       | Reported on page # |
|------------------------------|--------|--------------------------------------------------------------------------------------------------------------------------------------------------------------------------------------|--------------------|
| Title and abstract           | 1      | (a) Indicate the study's design with a commonly used term in the title or the abstract                                                                                               | 2                  |
|                              |        | (b) Provide in the abstract an informative and balanced summary of what was done and what was found                                                                                  | 2                  |
| <b>Introduction</b>          |        |                                                                                                                                                                                      |                    |
| Background/rationale         | 2      | Explain the scientific background and rationale for the investigation being reported                                                                                                 | 4                  |
| Objectives                   | 3      | State specific objectives, including any prespecified hypotheses                                                                                                                     | 5                  |
| <b>Methods</b>               |        |                                                                                                                                                                                      |                    |
| Study design                 | 4      | Present key elements of study design early in the paper                                                                                                                              | 6                  |
| Setting                      | 5      | Describe the setting, locations, and relevant dates, including periods of recruitment, exposure, follow-up, and data collection                                                      | 6                  |
| Participants                 | 6      | (a) Give the eligibility criteria, and the sources and methods of selection of participants                                                                                          | 6                  |
| Variables                    | 7      | Clearly define all outcomes, exposures, predictors, potential confounders, and effect modifiers. Give diagnostic criteria, if applicable                                             | 6-8                |
| Data sources/<br>measurement | 8*     | For each variable of interest, give sources of data and details of methods of assessment (measurement). Describe comparability of assessment methods if there is more than one group | 6-8                |
| Bias                         | 9      | Describe any efforts to address potential sources of bias                                                                                                                            | 15                 |
| Study size                   | 10     | Explain how the study size was arrived at                                                                                                                                            | 6                  |
| Quantitative variables       | 11     | Explain how quantitative variables were handled in the analyses. If applicable, describe which groupings were chosen and why                                                         | 6-8                |
| Statistical methods          | 12     | (a) Describe all statistical methods, including those used to control for confounding                                                                                                | 8-9                |
|                              |        | (b) Describe any methods used to examine subgroups and interactions                                                                                                                  |                    |
|                              |        | (c) Explain how missing data were addressed                                                                                                                                          |                    |
|                              |        | (d) If applicable, describe analytical methods taking account of sampling strategy                                                                                                   |                    |
|                              |        | (e) Describe any sensitivity analyses                                                                                                                                                | 8                  |
| <b>Results</b>               |        |                                                                                                                                                                                      |                    |

|                          |     |                                                                                                                                                                                                                                                                                                                                                                                                               |            |
|--------------------------|-----|---------------------------------------------------------------------------------------------------------------------------------------------------------------------------------------------------------------------------------------------------------------------------------------------------------------------------------------------------------------------------------------------------------------|------------|
| Participants             | 13* | (a) Report numbers of individuals at each stage of study—eg numbers potentially eligible, examined for eligibility, confirmed eligible, included in the study, completing follow-up, and analysed<br>(b) Give reasons for non-participation at each stage<br>(c) Consider use of a flow diagram                                                                                                               | 6          |
| Descriptive data         | 14* | (a) Give characteristics of study participants (eg demographic, clinical, social) and information on exposures and potential confounders<br>(b) Indicate number of participants with missing data for each variable of interest                                                                                                                                                                               | 10         |
| Outcome data             | 15* | Report numbers of outcome events or summary measures                                                                                                                                                                                                                                                                                                                                                          | 10         |
| Main results             | 16  | (a) Give unadjusted estimates and, if applicable, confounder-adjusted estimates and their precision (eg, 95% confidence interval). Make clear which confounders were adjusted for and why they were included<br>(b) Report category boundaries when continuous variables were categorized<br>(c) If relevant, consider translating estimates of relative risk into absolute risk for a meaningful time period | 10-11<br>7 |
| Other analyses           | 17  | Report other analyses done—eg analyses of subgroups and interactions, and sensitivity analyses                                                                                                                                                                                                                                                                                                                | 11         |
| <b>Discussion</b>        |     |                                                                                                                                                                                                                                                                                                                                                                                                               |            |
| Key results              | 18  | Summarise key results with reference to study objectives                                                                                                                                                                                                                                                                                                                                                      | 12         |
| Limitations              | 19  | Discuss limitations of the study, taking into account sources of potential bias or imprecision. Discuss both direction and magnitude of any potential bias                                                                                                                                                                                                                                                    | 15         |
| Interpretation           | 20  | Give a cautious overall interpretation of results considering objectives, limitations, multiplicity of analyses, results from similar studies, and other relevant evidence                                                                                                                                                                                                                                    | 12-15      |
| Generalisability         | 21  | Discuss the generalisability (external validity) of the study results                                                                                                                                                                                                                                                                                                                                         | 15         |
| <b>Other information</b> |     |                                                                                                                                                                                                                                                                                                                                                                                                               |            |
| Funding                  | 22  | Give the source of funding and the role of the funders for the present study and, if applicable, for the original study on which the present article is based                                                                                                                                                                                                                                                 | 16         |

\*Give information separately for cases and controls in case-control studies and, if applicable, for exposed and unexposed groups in cohort and cross-sectional studies.

**Note:** An Explanation and Elaboration article discusses each checklist item and gives methodological background and published examples of transparent reporting. The STROBE checklist is best used in conjunction with this article (freely available on the Web sites of PLoS Medicine at <http://www.plosmedicine.org/>, Annals of Internal Medicine at <http://www.annals.org/>, and Epidemiology at <http://www.epidem.com/>). Information on the STROBE Initiative is available at [www.strobe-statement.org](http://www.strobe-statement.org).
